# Supplementary material for: Inferring microbiota functions from taxonomic genes: a review
Source: PubMed Central journal article supplement (PMC8756179; doi:10.1093/gigascience/giab090), 2022-01-12
Supplement: giab090_giga-d-21-00316_revision_1.pdf [file giab090_giga-d-21-00316_revision_1.pdf]

|                                                      |                                                                                                                                                                                                                                                                                                                                                                                                                                                                                                                                                                                                                                                                                                                                                                                                                                                                                                                                                                                                                                                                                                                                                                                                                                                                                                                                                                                                                                                                                                                                            |
|------------------------------------------------------|--------------------------------------------------------------------------------------------------------------------------------------------------------------------------------------------------------------------------------------------------------------------------------------------------------------------------------------------------------------------------------------------------------------------------------------------------------------------------------------------------------------------------------------------------------------------------------------------------------------------------------------------------------------------------------------------------------------------------------------------------------------------------------------------------------------------------------------------------------------------------------------------------------------------------------------------------------------------------------------------------------------------------------------------------------------------------------------------------------------------------------------------------------------------------------------------------------------------------------------------------------------------------------------------------------------------------------------------------------------------------------------------------------------------------------------------------------------------------------------------------------------------------------------------|
| <b>Manuscript Number:</b>                            | GIGA-D-21-00316R1                                                                                                                                                                                                                                                                                                                                                                                                                                                                                                                                                                                                                                                                                                                                                                                                                                                                                                                                                                                                                                                                                                                                                                                                                                                                                                                                                                                                                                                                                                                          |
| <b>Full Title:</b>                                   | Inferring microbiota functions from taxonomic genes: a review                                                                                                                                                                                                                                                                                                                                                                                                                                                                                                                                                                                                                                                                                                                                                                                                                                                                                                                                                                                                                                                                                                                                                                                                                                                                                                                                                                                                                                                                              |
| <b>Article Type:</b>                                 | Review                                                                                                                                                                                                                                                                                                                                                                                                                                                                                                                                                                                                                                                                                                                                                                                                                                                                                                                                                                                                                                                                                                                                                                                                                                                                                                                                                                                                                                                                                                                                     |
| <b>Funding Information:</b>                          |                                                                                                                                                                                                                                                                                                                                                                                                                                                                                                                                                                                                                                                                                                                                                                                                                                                                                                                                                                                                                                                                                                                                                                                                                                                                                                                                                                                                                                                                                                                                            |
| <b>Abstract:</b>                                     | <p>Deciphering microbiota functions is crucial to predict ecosystem sustainability in response to global change. High-throughput sequencing at the individual or community level has revolutionized our understanding of microbial ecology, leading to the big data era and improving our ability to link microbial diversity with microbial functions. Recent advances in bioinformatics have been key for developing functional prediction tools based on DNA metabarcoding data and using taxonomic gene information. This cheaper approach in every aspect serves as an alternative to shotgun sequencing. Although these tools are increasingly used by ecologists, an objective evaluation of their modularity, portability and robustness is lacking. Here, we reviewed one hundred scientific papers on functional inference and ecological trait assignment to rank the advantages, specificities and drawbacks of these tools, using a scientific benchmarking. To date, inference tools have been mainly devoted to bacterial functions, and ecological trait assignment tools to fungal functions. A major limitation is the lack of reference genomes – compared with the human microbiota –, especially for complex ecosystems like soils. In fine, we explore applied research prospects. These tools are very promising and already provide relevant information on ecosystem functioning, but standardized indicators and corresponding repositories are still lacking for them to be used for operational diagnosis.</p> |
| <b>Corresponding Author:</b>                         | Lionel Ranjard, Ph.D.<br>INRA UMR 1347: Agroecologie<br>Dijon, FRANCE                                                                                                                                                                                                                                                                                                                                                                                                                                                                                                                                                                                                                                                                                                                                                                                                                                                                                                                                                                                                                                                                                                                                                                                                                                                                                                                                                                                                                                                                      |
| <b>Corresponding Author Secondary Information:</b>   |                                                                                                                                                                                                                                                                                                                                                                                                                                                                                                                                                                                                                                                                                                                                                                                                                                                                                                                                                                                                                                                                                                                                                                                                                                                                                                                                                                                                                                                                                                                                            |
| <b>Corresponding Author's Institution:</b>           | INRA UMR 1347: Agroecologie                                                                                                                                                                                                                                                                                                                                                                                                                                                                                                                                                                                                                                                                                                                                                                                                                                                                                                                                                                                                                                                                                                                                                                                                                                                                                                                                                                                                                                                                                                                |
| <b>Corresponding Author's Secondary Institution:</b> |                                                                                                                                                                                                                                                                                                                                                                                                                                                                                                                                                                                                                                                                                                                                                                                                                                                                                                                                                                                                                                                                                                                                                                                                                                                                                                                                                                                                                                                                                                                                            |
| <b>First Author:</b>                                 | Christophe Djemiel, Ph.D.                                                                                                                                                                                                                                                                                                                                                                                                                                                                                                                                                                                                                                                                                                                                                                                                                                                                                                                                                                                                                                                                                                                                                                                                                                                                                                                                                                                                                                                                                                                  |
| <b>First Author Secondary Information:</b>           |                                                                                                                                                                                                                                                                                                                                                                                                                                                                                                                                                                                                                                                                                                                                                                                                                                                                                                                                                                                                                                                                                                                                                                                                                                                                                                                                                                                                                                                                                                                                            |
| <b>Order of Authors:</b>                             | <p>Christophe Djemiel, Ph.D.</p> <p>Pierre-Alain Maron, Ph.D.</p> <p>Sébastien Terrat, Ph.D.</p> <p>Samuel Dequiedt</p> <p>Aurélien Cottin, Ph.D.</p> <p>Lionel Ranjard, Ph.D.</p>                                                                                                                                                                                                                                                                                                                                                                                                                                                                                                                                                                                                                                                                                                                                                                                                                                                                                                                                                                                                                                                                                                                                                                                                                                                                                                                                                         |
| <b>Order of Authors Secondary Information:</b>       |                                                                                                                                                                                                                                                                                                                                                                                                                                                                                                                                                                                                                                                                                                                                                                                                                                                                                                                                                                                                                                                                                                                                                                                                                                                                                                                                                                                                                                                                                                                                            |
| <b>Response to Reviewers:</b>                        | <p>Dear Editor,</p> <p>Please find enclosed the revised version of the paper Submission ID GIGA-D-21-00316 Inferring microbiota functions from taxonomic genes: a review by Christophe Djemiel, Pierre-Alain Maron, Sébastien Terrat, Samuel Dequiedt, Aurélien Cottin, Lionel Ranjard.</p> <p>We answered carefully to the all comments of the reviewer 1 and 2. We thank the 2 reviewers, for their helpful comments during the reviewing process. We hope that the paper is now suitable for publication in GigaScience, and we look forward to hearing</p>                                                                                                                                                                                                                                                                                                                                                                                                                                                                                                                                                                                                                                                                                                                                                                                                                                                                                                                                                                             |

from you.  
Kind regards  
Christophe Djemiel & Lionel Ranjard

Reviewer reports:

Reviewer #1: This review manuscript provides an overview of the various options that have been developed for inferring function from taxonomic data, for Bacteria, Archaea and Fungi. It should be a good resource and introduction to the topic. One aspect that could be developed a bit more is that of specificity in functional prediction.

First of all, we want to thank the Reviewer 1 for these commentaries and he pinpoints some drawbacks to help us improving it.

The specific corrections, and modifications advised by the Reviewer 1 will be highlighted in Green in the manuscript.

Throughout, please change "consists in" to "consists of"

As requested, we did the correction, and checked in the whole manuscript (lines 205, 239, 258, 330).

Line 113: It is unclear why soil quality is mentioned here

Indeed, we chose to delete the "soil quality" term to avoid focusing our sentence only just on soil diagnosis, keeping only the global point of view in this background section. We also changed the next sentence in order to ensure consistency ("A repository" to "Repositories").

Line 145: Change "ocean" to "marine" or "aquatic"?

As requested, we did the correction in the sentence.

Line 148: Change "rDNA" to "rRNA gene"

As requested, we did the correction in the sentence.

Line 219: The comparison here to shotgun metagenomics should consider the impact of horizontal gene transfer and gene loss.

As requested, we have added a sentence to indicate that inferred metagenomes do not allow the study of lateral gene transfer and gene loss unlike shotgun metagenomics. In addition, only archaea, bacteria, and fungi can be studied directly by these tools, unlike shotgun metagenomics which provides an overview of all microbial communities.

Similarly, Line 545 should consider gene deletion in addition to horizontal gene transfer.

As requested, we have completed our sentence to indicate that gene gain and loss was also due to gene duplication, gene loss, and de novo gene birth in addition to predominant mode HGT. We have also added bibliographic references regarding the identification of HGT from shotgun metagenomic data.

Line 552: In addition to plasmid transfer, should consider phage / viruses

As requested, we have added a sentence to complete our paragraph on the transfer of plasmids by phages or viruses.

Line 665: It could be instructive to provide more examples of practical applications

Indeed, we were in the same expectation as reviewer 1 but there are very few examples of practical applications. Moreover, this is what we underline throughout our manuscript. However, as requested, we added two examples in the human health on the search for cancer biomarkers and two examples on the biomonitoring of water quality. We have also added bibliographic references regarding these practical applications.

Line 699: It is not clear why these particular soil measurements are of interest

Yes, we fully agree with the reviewer 1. As requested, we added a sentence to precise the definition of the volatile organic compound in order clear why it is interesting to use these soil measurements. We also added VOC abbreviation in the section Abbreviations.

|                                                                                                                                                                                                                                                                                                        |                                                                                                                                                                                                                                                                                                                                                                                                                                                                                                                                                                                                                                                                                                                                                                                                                                                                                                                                                                                                                                                                                                                                                                                                                                                                                                                                                                                                                                                                                                                                                                                                                                                                                                                                                                                                                                                                                                                                                                                     |
|--------------------------------------------------------------------------------------------------------------------------------------------------------------------------------------------------------------------------------------------------------------------------------------------------------|-------------------------------------------------------------------------------------------------------------------------------------------------------------------------------------------------------------------------------------------------------------------------------------------------------------------------------------------------------------------------------------------------------------------------------------------------------------------------------------------------------------------------------------------------------------------------------------------------------------------------------------------------------------------------------------------------------------------------------------------------------------------------------------------------------------------------------------------------------------------------------------------------------------------------------------------------------------------------------------------------------------------------------------------------------------------------------------------------------------------------------------------------------------------------------------------------------------------------------------------------------------------------------------------------------------------------------------------------------------------------------------------------------------------------------------------------------------------------------------------------------------------------------------------------------------------------------------------------------------------------------------------------------------------------------------------------------------------------------------------------------------------------------------------------------------------------------------------------------------------------------------------------------------------------------------------------------------------------------------|
|                                                                                                                                                                                                                                                                                                        | <p>Figure 1: Change "Functional inference" to "Functional inference"<br/>As requested, we did the correction in the figure 1.</p> <p>Figure 2: Add data for most recent years?<br/>Yes, we fully agree, it is not intended and we added data for 2018, 2019 and 2020 years in the figure 2.</p> <p>Figure 9: Change "Unknow or few data" to "Unknown or insufficient data"<br/>As requested, we did the correction in the figure 9.</p> <p>Reviewer: 2<br/>Reviewer #2: The authors presented a review about inferring microbiota functions from taxonomic genes. In general, this topic is very important to gain more insights from amplicon based sequencing strategies to decipher the role of the microbiome. The manuscript is clearly written and the authors present nicely the state of current tools. I have just a couple of minor comments that should be addressed.</p> <p>First of all, we want to thank the Reviewer 2 for these commentaries and he pinpoints some drawbacks to help us improving it.</p> <p>The specific corrections, and modifications advised by the Reviewer 2 will be highlighted in Blue in the manuscript.</p> <p>I wonder whether the author can mention PICRUST2 earlier in the manuscript as it is a great improvement compared to v1. I would suggest to add one sentence in the section about PICRUST v1.<br/>As requested, we have added sentence to describe the main improvements of PICRUST2 following the paragraph of PICRUST1 (L271).</p> <p>[L176] @MInter should be spelled correctly.<br/>As requested, we did the correction in the sentence.</p> <p>[L224] Picrust should be written PICRUST<br/>As requested, we did the correction in the sentence.</p> <p>[L421] The author write 'No tool...' but I guess it should be 'The tool...'<br/>Indeed, it is a clerical error. We did the correction in the sentence.</p> <p>[L508] A space is missing ('...fungi - along with...')<br/>As requested, we added the space.</p> |
| <b>Additional Information:</b>                                                                                                                                                                                                                                                                         |                                                                                                                                                                                                                                                                                                                                                                                                                                                                                                                                                                                                                                                                                                                                                                                                                                                                                                                                                                                                                                                                                                                                                                                                                                                                                                                                                                                                                                                                                                                                                                                                                                                                                                                                                                                                                                                                                                                                                                                     |
| <b>Question</b>                                                                                                                                                                                                                                                                                        | <b>Response</b>                                                                                                                                                                                                                                                                                                                                                                                                                                                                                                                                                                                                                                                                                                                                                                                                                                                                                                                                                                                                                                                                                                                                                                                                                                                                                                                                                                                                                                                                                                                                                                                                                                                                                                                                                                                                                                                                                                                                                                     |
| Are you submitting this manuscript to a special series or article collection?                                                                                                                                                                                                                          | No                                                                                                                                                                                                                                                                                                                                                                                                                                                                                                                                                                                                                                                                                                                                                                                                                                                                                                                                                                                                                                                                                                                                                                                                                                                                                                                                                                                                                                                                                                                                                                                                                                                                                                                                                                                                                                                                                                                                                                                  |
| <b>Experimental design and statistics</b>                                                                                                                                                                                                                                                              | Yes                                                                                                                                                                                                                                                                                                                                                                                                                                                                                                                                                                                                                                                                                                                                                                                                                                                                                                                                                                                                                                                                                                                                                                                                                                                                                                                                                                                                                                                                                                                                                                                                                                                                                                                                                                                                                                                                                                                                                                                 |
| <p>Full details of the experimental design and statistical methods used should be given in the Methods section, as detailed in our <a href="#">Minimum Standards Reporting Checklist</a>. Information essential to interpreting the data presented should be made available in the figure legends.</p> |                                                                                                                                                                                                                                                                                                                                                                                                                                                                                                                                                                                                                                                                                                                                                                                                                                                                                                                                                                                                                                                                                                                                                                                                                                                                                                                                                                                                                                                                                                                                                                                                                                                                                                                                                                                                                                                                                                                                                                                     |

|                                                                                                                                                                                                                                                                                                                                                                                                                                                                                                                                                         |            |
|---------------------------------------------------------------------------------------------------------------------------------------------------------------------------------------------------------------------------------------------------------------------------------------------------------------------------------------------------------------------------------------------------------------------------------------------------------------------------------------------------------------------------------------------------------|------------|
| <p>Have you included all the information requested in your manuscript?</p>                                                                                                                                                                                                                                                                                                                                                                                                                                                                              |            |
| <p><b>Resources</b></p> <p>A description of all resources used, including antibodies, cell lines, animals and software tools, with enough information to allow them to be uniquely identified, should be included in the Methods section. Authors are strongly encouraged to cite <a href="#">Research Resource Identifiers</a> (RRIDs) for antibodies, model organisms and tools, where possible.</p> <p>Have you included the information requested as detailed in our <a href="#">Minimum Standards Reporting Checklist</a>?</p>                     | <p>Yes</p> |
| <p><b>Availability of data and materials</b></p> <p>All datasets and code on which the conclusions of the paper rely must be either included in your submission or deposited in <a href="#">publicly available repositories</a> (where available and ethically appropriate), referencing such data using a unique identifier in the references and in the “Availability of Data and Materials” section of your manuscript.</p> <p>Have you have met the above requirement as detailed in our <a href="#">Minimum Standards Reporting Checklist</a>?</p> | <p>Yes</p> |

# 1                    **Inferring microbiota functions from taxonomic genes: a review**

2

3    Christophe Djemiel<sup>1</sup>, Pierre-Alain Maron<sup>1</sup>, Sébastien Terrat<sup>1</sup>, Samuel Dequiedt<sup>1</sup>,  
4    Aurélien Cottin<sup>1</sup>, Lionel Ranjard<sup>1</sup>

5

6    Authors' affiliations

7    <sup>1</sup> Agroécologie, Agrosup Dijon, INRAE, Univ. Bourgogne, Univ. Bourgogne Franche-  
8    Comté, F-21000 Dijon, France.

9

## 10    **Corresponding author**

11    Correspondence to Lionel Ranjard: [lionel.ranjard@inrae.fr](mailto:lionel.ranjard@inrae.fr)

12

## 13    **Abstract**

14    Deciphering microbiota functions is crucial to predict ecosystem sustainability in re-  
15    sponse to global change. High-throughput sequencing at the individual or community  
16    level has revolutionized our understanding of microbial ecology, leading to the big data  
17    era and improving our ability to link microbial diversity with microbial functions. Recent  
18    advances in bioinformatics have been key for developing functional prediction tools  
19    based on DNA metabarcoding data and using taxonomic gene information. This  
20    cheaper approach in every aspect serves as an alternative to shotgun sequencing.  
21    Although these tools are increasingly used by ecologists, an objective evaluation of  
22    their modularity, portability and robustness is lacking. Here, we reviewed one hundred  
23    scientific papers on functional inference and ecological trait assignment to rank the  
24    advantages, specificities and drawbacks of these tools, using a scientific benchmark-

25 ing. To date, inference tools have been mainly devoted to bacterial functions, and eco-  
26 logical trait assignment tools to fungal functions. A major limitation is the lack of refer-  
27 ence genomes – compared with the human microbiota –, especially for complex eco-  
28 systems like soils. *In fine*, we explore applied research prospects. These tools are very  
29 promising and already provide relevant information on ecosystem functioning, but  
30 standardized indicators and corresponding repositories are still lacking for them to be  
31 used for operational diagnosis.

32

### 33 **Keywords**

34 Microbiota; Metabarcoding; Taxonomy; Functional inference; Ecological traits; Soil

35

### 36 **1. Background**

37 Microorganisms are present in all habitats on Earth and are essential for  
38 animals, plants, and therefore for the sustainability of human activities [1]. The  
39 extraordinary diversity of microbial communities plays an essential role in the various  
40 biogeochemical cycles, allows aquatic and terrestrial ecosystems to function properly  
41 and ensures their ability to provide ecological services (*e.g.*, soil structuring, organic  
42 matter renewal, nutrient recycling, pollution control, regulation of / barrier to pathogens,  
43 or even plant productivity) [2–4]. Their fabulous capacity to adapt to different  
44 environmental stresses over time is now well known, and the regulation process of  
45 their diversity is better and better deciphered. Despite these tremendous  
46 improvements in the approaches targeting indigenous microbiotas, our understanding  
47 of the link between microbes and their associated functions remains limited [5]. A  
48 workshop hosted by the British Ecological Society’s Microbial Ecology Special Interest  
49 Group (June 2016) recently identified fifty important research questions in microbial

50 ecology. One of the main ones was "What methods can we use to marry microbial  
51 diversity with function; how do we link transcriptomics, proteomics and metabolomics?"  
52 [6]. This sums up the future challenges facing the scientific community when it comes  
53 to improving our understanding of the regulation of the microbiome diversity and  
54 functions [7].

55 Microbial functions can be characterized from genomic, proteomic or metabolic data  
56 (Fig. 1) [8–10]. Considering genomics, quantitative PCR (qPCR) and microarrays were  
57 the first technologies used to describe functional genes or taxa from complex  
58 environmental samples [11]. Initially designed to determine the absolute copy number  
59 of a single given gene, the latest technical advances can analyze thousands of  
60 combinations of samples and targets in parallel [12]. Standardized methods even make  
61 it possible to quantify genes of interest (*e.g.*, involved in biogeochemical cycles,  
62 pesticide degradation, etc.) to estimate soil quality [13]. DNA microarrays were the first  
63 high-throughput technologies giving access to gene expression profiles at the  
64 individual or community levels [11,14]. There exist different kinds of microarrays (*e.g.*,  
65 PhyloChip, GeoChip; PathoChip; StressChip; CAZyChip). They provide a snapshot of  
66 microbial diversity (bacteria, fungi, viruses) and / or of the functional genes present in  
67 a given sample (*e.g.*, genes coding for enzymes involved in polysaccharide  
68 degradation) [15–18]. Some of these microarrays have become diagnostic tools in  
69 many fields, in particular for targeting viruses, bacterial or fungal pathogens or harmful  
70 organisms [19]. More recent and cheaper, various high-throughput sequencing (HTS)  
71 alternatives have been developed to explore microbial communities (Fig. 1) [20].  
72 Genome and metagenome sequencing have changed the microbial ecology field:  
73 thanks to genome sequencing and meta-omics approaches, gene catalogs can be  
74 assessed, and new microorganisms can be discovered [21,22].

75 For example, by implementing a metabarcoding approach, microbial ecologists  
76 were first very enthusiastic about such huge taxonomic information, but quickly pointed  
77 out the lack of associated functional information [22]. Taxonomic profiles can indeed  
78 change to varying degrees among samples, and predicting to what extent these  
79 changes impact the overall functional capacity of the community has remained a  
80 technical and scientific challenge to date [6,23,24]. Metabarcoding may well be used  
81 to directly target functional genes and classify them by taxonomic group, but  
82 applications remain limited to a few families [25–29]. In the face of these limitations,  
83 two solutions have emerged to indirectly obtain functional information from taxonomic  
84 profiles, *i.e.* (i) functional inference, and (ii) ecological trait assignment, using  
85 (meta)genome and microbiome big data (Fig. 1). Functional inference predicts the  
86 putative functions (*e.g.*, gene catalogs, metabolic pathways) of microbial communities,  
87 while ecological trait assignment directly retrieves a trait common to all taxa by linking  
88 taxonomic names with a dedicated database. The major difference between these two  
89 solutions for obtaining functional information is that functional inference retrieves  
90 functions even for OTUs without a taxonomic name thanks to phylogenetic placement  
91 of sequences (taxonomic markers) in a reference tree and different evolutionary  
92 models.

93 Many bioinformatic tools have been developed since the first publication about  
94 a functional prediction tool using metabarcoding data. To date, only one review has  
95 addressed functional inference tools; it is focused on aquaculture and on a limited  
96 subset of all the tools available to predict functions from 16S rDNA metabarcoding  
97 datasets [30]. Therefore, in the present context where new solutions are proposed  
98 regularly to predict putative function profiles, the state of the art needs to be scrutinized  
99 more exhaustively to build a scientific and technical benchmark. More precisely, we



100 provide a detailed description of each tool and evaluate their advantages, specificities  
101 and drawbacks by paying special attention to their methods, modularity, portability, and  
102 robustness. One of the main objectives of this review is to provide a rationale on the  
103 use of the different tools currently available for prokaryote and fungal communities and  
104 draw perspectives, with a few suggestions to enhance their usefulness in microbial  
105 ecology. Finally, we illustrate the application of these methods with studies focusing  
106 on the soil environment. The choice of this particular system is justified by the fact that  
107 it is the most diverse and complex one in terms of microbial diversity, ecology and  
108 functional reservoir [4,31]; therefore, it represents the most challenging environmental  
109 matrix for linking diversity and functions. We believe that this work will help scientists  
110 working on microbial communities make choices to best take advantage of their high  
111 amount of microbial data. This work also shows that although those approaches are  
112 promising, they still need improvements to make them operational tools for microbial  
113 diagnosis. **Repositories** using standardized and robust metrics **are** still lacking when it  
114 comes to interpreting the results.

115

## 116 **2. Historical and recent increase of microbial datasets**

117 The emergence of HTS in the mid 2000's generated a huge volume of data, leading  
118 to a revolution in our way of describing biodiversity. This rise of microbial data can be  
119 directly linked to the improvement of high-throughput sequencing technologies,  
120 concomitantly with a tremendous drop of sequencing costs (Fig. 2). This was reflected,  
121 with a small time lag, by an increase in the number of sequence read archives (SRAs)  
122 linked to metabarcoding data deposited on the NCBI website (Fig. 2).  
123 Thanks to the contribution of ecologists, microbiologists, taxonomists and computer  
124 scientists, the databases are continuously enriched and are key to enhance our

125 knowledge about the description and determinism of environmental and human  
126 microbiotas [32,33]. For example, the 16S rDNA sequences data available to analyze  
127 bacterial/archaeal diversity was multiplied by 4 and 10 in the RDP and SILVA  
128 databases, respectively, between 2007 and 2019 (Fig. 3A). The trend is the same for  
129 fungal diversity, with a doubling of ITS sequences in the UNITE/INSD database within  
130 the last five years (Fig. 3B). 16S rDNA sequences are much more numerous than ITS  
131 sequences. However, there were 30 times more fungal species referenced than  
132 bacterial ones in 2017 (Fig. 3A, 3B). The numbers of microbial genomes available, in  
133 particular in the JGI platform, have increased continuously, and they outpaced Moore's  
134 Law mostly from 2013 for bacteria and archaea (Fig. 3C, 3D).

135 The number of known microbial genes, enzymes or metabolic pathways available in  
136 specialized databases has also considerably increased in the last few years [34–36].  
137 Thousands of functional information files are currently accessible in the KEGG, CAZy  
138 or MetaCyc databases (Table 1). A recent survey predicted the total global estimated  
139 bacterial and fungal functions based on KEGG Orthology to reach 35.5 and 3.2 million,  
140 respectively [37]. The authors also indicated that only a tiny fraction of these functions  
141 is known today, representing 0.02% and 0.14% for bacteria and fungi, respectively.  
142 Although the characterization of gene catalogs using metagenomic approaches was  
143 recently criticized [38], the number of non-redundant genes provides an overview of  
144 the potential functional reservoir available across various ecosystems [39]. The soil by  
145 far appears to harbor the largest pool of functions, followed by the **marine**, and then  
146 animal microbiomes (Fig. 4).

147 The rapid growth of available genomes is a unique opportunity to predict the putative  
148 microbial functions from metabarcoding data by linking taxonomic markers (*i.e.*, **rRNA**  
149 **gene** amplicons) and their reference genomes or ecological traits. Therefore, the next

150 section is devoted to the different tools and databases dedicated to functional inference  
151 and ecological trait assignment for bacterial and fungal communities.

152

### 153 3. **Overview of the available tools for predicting the potential functions of the** 154 **microbiotas**

155 HTS and the presently increasing collection of functional or ecological traits on a  
156 more regular and rigorous basis are promising cues for linking biodiversity and  
157 associated functions in the near future [24,40]. In the literature, the term "function" is  
158 used in different ways depending on the study model, the time scale, or even the  
159 habitat [41–44]. The notion of function may refer to genes, enzymes, or metabolic  
160 pathways, but may also represent ecological traits that bring together phenotypic and  
161 biochemical notions [45–47].

162 Based on the analysis of twenty papers since 2013, we classified the databases and  
163 tools according to the granularity of the results (Fig. 5A), from general information such  
164 as ecological traits to more detailed information such as genes or metabolic pathways  
165 (Fig. 5). The tools used to obtain fine results, *i.e.*, at the metabolic pathway or gene  
166 levels for any taxonomic resolution, are known as functional inference tools (Fig. 5B).  
167 On the other hand, we grouped existing tools or databases under the term “ecological  
168 trait assignment” when functional information referred to phenotypic or ecological traits  
169 and was accessible only for a specific taxonomic rank (Fig. 5C). Indeed, there is a  
170 wealth of information often linked to ecological traits in published scientific articles, or  
171 of partially formatted metadata (*i.e.*, partial taxonomy or data not linked to the ID of a  
172 taxonomic database) [48].

173 Tools or methods exist, known under the term “text mining”, to automatically collect  
174 data from various sources (*e.g.*, a website, a document in pdf format) through

175 automatic language processing (e.g., natural language processing (NLP)) [49]. For  
176 example, @MInter [50] retrieves information related to microbial interactions from  
177 abstracts of papers thanks to a supervised machine learning model. Other tools are  
178 based on ontologies, *i.e.*, they use a structured set of terms and concepts from a  
179 particular domain by specifying the relationships between these terms and their  
180 properties, and thus have a common reference for the use of a common vocabulary.  
181 For example, OntoBiotope [51] ontology in the food field retrieves the phenotypes and  
182 habitats of microbes from the literature based on the NCBI taxonomy. Another ontology  
183 exists, called Ontology of Microbial Phenotype [52]; it brings together a structured set  
184 of terms and concepts around microbial phenotypes, and specifies the relationships  
185 between these terms and their properties. Tools also based on machine learning such  
186 as ProTraits [53] can automatically annotate prokaryotic species based on phenotypic  
187 or genomic data from scientific articles or online resources (<http://protraits.irb.hr>).  
188 To date, we have recorded about twenty tools or databases that retrieve functional or  
189 ecological data from microbial taxonomic markers, with two to four developments *per*  
190 year (Fig. 6 and Table 2). The timeline shows that most of these tools (18/23 in total)  
191 are only dedicated to bacteria/archaea, two are dedicated to bacteria/archaea + fungi,  
192 and only three are specifically dedicated to fungal organisms. It is important to also  
193 underline that most of these tools are devoted to functional inference (13/23). The most  
194 cited tool is PICRUSt v1 [54], which remains on top of all others with more than 4,000  
195 citations in 2020. While FUNGuild [55], Tax4Fun v1 [56] or FAPROTAX [57] are  
196 reasonably cited with a few hundred citations, the others are very less so with only a  
197 dozen citations (Fig. 7A). Interestingly, the articles citing functional inference and  
198 ecological trait assignment tools fall within the same scope as the scopes for which  
199 they were initially developed (Fig 7B.): PICRUSt, FUNGuild and PAPERICA are mainly

200 cited in papers about human health, the soil and the marine environments,  
201 respectively.

202

### 203 3.1. Functional Inference

#### 204 3.1.1. Definition

205 Functional inference consists of predicting the functional potential of a microbial  
206 community from metabarcoding data. The functional potential of a taxon or of a  
207 microbial community represents the metabolic capacities based on the presence /  
208 absence of genes involved in these pathways. Functional inference methods are based  
209 on the assumption that phylogenetic information from marker gene sequences  
210 correlates well enough with the genomic content to produce accurate predictions when  
211 associated reference genomes are available. In other words, it assumes a significant  
212 relationship between (i) the phylogenetic distance between taxonomic markers and (ii)  
213 the conservation of the genetic content, referring to vertical gene descent during the  
214 evolution of microbial genomes. This is made possible through the relationship  
215 between the phylogenetic relatedness of organisms and their gene content [58,59]  
216 (Fig. 5B).

217 It should be emphasized that the presence of one or more genes involved in a function  
218 remains “potential” and may not be expressed under environmental conditions. From  
219 this point of view, functional inference results may be similar to shotgun metagenomics  
220 data, which is often observed in the literature, especially when focusing on a family of  
221 genes or a specific biogeochemical cycle [60]. Also, the fact that inferred metagenomes  
222 are based only on the reference genomes available in these tools (archaea, bacteria,  
223 fungi), the lateral gene transfer and gene loss cannot be studied unlike shotgun  
224 metagenomics.

225

226 3.1.2. Available tools

227 **PICRUSt**

228 Phylogenetic Investigation of Communities by Reconstruction of Unobserved States  
229 (PICRUSt) v1 [54] is the first tool to have been developed to predict potential functional  
230 genes from 16S rRNA metabarcoding and has been the most popular one since it was  
231 launched in 2013 (Fig. 5B). PICRUSt v1 needs three things: (i) a reference OTU, (ii) a  
232 reference genome, and (iii) a reference phylogenetic tree. As regards the reference  
233 OTU, the file (in BIOM or tabulated format) is expected to contain a standard OTU  
234 abundance table with sequences picked only against the Greengenes taxonomic  
235 reference (18 May 2012 or v13.5/v13.8). This tool based on a modified method of  
236 ancestral state reconstruction (ASR) deduces functional information for taxa without a  
237 match in the reference genomes. The reference genomes are functional proxies that  
238 provide a weighting of the functional profiles for the phylogenetically close taxa within  
239 a reference phylogenetic tree. The PICRUSt method is divided into three main steps  
240 that are necessary to obtain relevant information on functional profiles: (i) genome  
241 prediction, (ii) metagenome prediction, and (iii) analysis of predictions.

242 The genome prediction step consists of preparing the trees and checking the quality of  
243 the input datasets; then comes the reconstruction of ancestral states in the reference  
244 tree (ASR, 4 methodologies are available). Using the output files, the software program  
245 predicts traits for leaves of the phylogenetic tree lacking sequenced genomes.

246 During the metagenome prediction step, normalization of the abundance of each OTU  
247 is carried out based on rRNA gene copy numbers to predict the functional category  
248 abundances of the metagenome. The user obtains an abundance table for each  
249 functional category *per* sample. The correcting step of the rRNA gene copy numbers

250 (GCNs) allows normalizing to correct the biases towards microorganisms with greater  
251 GCNs and improve the estimation of microbial diversity [61]. This step is recommended  
252 when the OTUs are phylogenetically closely linked to the genomes [62]. To assess the  
253 robustness of the predictions, *i.e.*, to obtain the representativeness of the database  
254 towards a community of interest, a nearest sequenced taxon index (NSTI) is generated  
255 for each sample. It is calculated using the average of the branches that separate the  
256 sequences of interest (OTUs, ASVs) in a sample from the reference microbial genome,  
257 with a weighting by their relative abundance in the sample. This confidence score is  
258 one of the major strengths of this tool. Regarding functional categories, information can  
259 be obtained at different levels (genes or metabolic pathways) with more or less detailed  
260 descriptions (EC numbers, KEGG pathway [35], COG). Information about all functional  
261 categories can also be obtained for each OTU. The last step consists of analyzing the  
262 predicted data. This step is essential for interpreting the large number of results  
263 generated from a robust statistical analysis.

264 The major strength of PICRUSt v1 lies in its evolutionary models that infer functions  
265 for the complete bacterial community. The portability of this tool with the support of a  
266 broad stakeholder community including a forum (google group), blogs, are advantages  
267 that make it a central tool for functional predictions (Table 2). Despite all its benefits,  
268 PICRUSt v1 has drawbacks such as focusing only on the 16S rDNA marker and using  
269 only Greengenes taxonomy (Table 2). Several specialized tools have emerged to  
270 integrate PICRUSt as a sub-layer in order to carry out diagnoses in the medical field  
271 [63] or directly in a pipeline [64]. PICRUSt v2 fills the gaps of the first version, with an  
272 improvement that allows inference directly based on the sequences and no longer  
273 through taxonomy. Another improvement concerns the addition of bacterial but also

274 fungal reference genomes, thus making it possible to infer from 18S rDNA and ITS  
275 amplicons [65].

276

### 277 *PAPRICA*

278 Pathway Prediction by Phylogenetic Placement (PAPRICA) [66] infers the metabolic  
279 potential of prokaryotic and eukaryotic communities from metabarcoding data based  
280 on rRNA gene amplicons. It was the first tool that allowed for the functional prediction  
281 of 16S and 18S rRNA amplicons. It comes in the form of a pipeline taking the OTU  
282 reads as inputs to place them in an rRNA reference tree built from complete genomes.  
283 To build this tree, a consensus genome is found for each node in the tree, which then  
284 makes it possible to predict metabolic pathways for the sequences of interest without  
285 a match in the complete reference genomes. The abundance of metabolic pathways  
286 is weighted by rRNA gene copy numbers from known genomes. A strength of this tool  
287 is that it also provides an indicator of genomic stability depicting the robustness of the  
288 results. However, PAPRICA, like all the tools using a reference phylogenetic tree and  
289 sequence placement methods, is dependent on the quality of rRNA resolution, and this  
290 represents a drawback when some clades may be affected (Table 2).

291

### 292 *Tax4Fun*

293 Tax4Fun [56] is an R [67] package published in 2015 for predicting functional profiles  
294 from targeted metagenomic 16S rRNA data. However, the algorithm and statistical  
295 efficiency based on a metabolic mixture model in terms of a mixture of pathways (MoP)  
296 was developed in 2013. This R-based architecture is inherently a cross-platform tool,  
297 and it may be more accessible for a large number of users with low experience in  
298 bioinformatics. This tool uses pre-calculated functional profiles like PICRUSt v1 and



299 taxonomic data formatted from the SILVA database. One of the differences with  
300 PICRUSSt the rRNA sequence placement in the reference genomes, which is achieved  
301 by a BLAST search (instead of a tree placement approach for PICRUSSt). It is a very  
302 convenient tool because it provides a confidence score (FTU and FSU) to determine  
303 the fraction of OTUs that was not mapped to KEGG organisms or the number of  
304 sequences without KEGG Orthology (KO) hits (Table 2). Like PICRUSSt v1, it cannot be  
305 used for fungal diversity predictions.

306

### 307 *Piphillin*

308 Piphillin [68] differs from the PICRUSSt or PAPRICA approaches because it does not  
309 use a phylogenetic tree or database (16S) but directly maps the OTU sequences on  
310 the rRNA of the reference genomes using a nearest-neighbor algorithm. This  
311 specificity could avoid faulty sequence placements in the reference phylogenetic tree.  
312 It is used online only, which represents both a strength and a weakness: it benefits  
313 from computing power (a strength), whose strength depends on the hosting server  
314 (e.g. quota management, cluster configuration) (a weakness). A Piphillin sub-layer  
315 also exists to complete the analysis of the results [69].

316

317 The quality of prediction represents a prerequisite for the application of the above-  
318 presented tools to study indigenous microbial communities. It may depend on the tool,  
319 but also on the type of targeted ecosystem. To test the quality of functional prediction  
320 according to the tool and the studied ecosystem, we compiled the NSTI scores for  
321 PICRUSSt v1 and the FTUs for Tax4Fun from a subsampling of articles that covered a  
322 range of ecosystems – human, marine, plant, and soil (Fig. 8). Whatever the tool, the  
323 best predictions were obtained for the human microbiotas, and the most approximate

324 ones for the soil samples. The variability of quality scores across the different soil  
325 studies seemed to be lower with PICRUSt than with Tax4Fun. Nevertheless, some soil  
326 studies using Tax4fun indicate a good-quality survey with only about 30% of OTUs  
327 unmapped to a reference. This likely reflects the discrepancy between human  
328 reference genome availability and soil microbiota genome availability. In addition,  
329 microbial diversity is much more complex in soils than in the human microbiotas. In  
330 this case, it is essential that the quality scores from functional inference tools should  
331 be taken into account because it is a key to a robust interpretation of the results.  
332 Unfortunately, we found few studies indicating these quality scores.

333

## 334 3.2. Ecological trait assignment

335

### 336 3.2.1. Definition

337 Ecological trait assignment differs from functional inference since it consists of  
338 obtaining information on the life strategy, phenotypic and quantitative genomic traits  
339 (e.g., trophic modes, growth strategy) of a taxon from its nomenclature, whatever its  
340 taxonomic rank. If the taxon is not present in the database, it will not be possible to  
341 know its traits (Fig. 5C). This approach is faster than functional inference for retrieving  
342 an item of functional information, but tools dedicated to metabarcoding outputs are  
343 lacking, and only a few ecological traits are available (Table 2). The main interest is to  
344 get functional information with a possibly not so fine granularity as functional inference  
345 does, but obviously more accurate. Ecological traits are indeed often based on results  
346 with biochemical experimentations from curated databases or scientific publications.  
347 Practically speaking, only the guild will be recovered and for example the fungal  
348 sequences identified as belonging to the *Serpula* genus will be assigned to a wood

349 saprotroph when an ecological trait tool is used; with an inference tool, the abundance  
350 of various genes related to polysaccharide degradation will be attributed to all fungal  
351 sequences.

352

### 353 3.2.2. Tools

#### 354 *FUNGuild*

355 FUNGuild [55] is the pioneer and one of the few tools that assigns ecological traits to  
356 fungi based on their taxonomy (Table 2). These assignments rely on metabarcoding  
357 data. They require providing a contingency table (OTUs or sequence counts *per*  
358 sample) and the link between each OTU and its taxonomy. To carry out the  
359 assignment, FUNGuild uses its own curated database, and searches it for the taxon.  
360 This database contains several taxonomic levels (*e.g.*, phylum, genus, species).  
361 However, the taxonomic name at the genus or species level is necessary to assign  
362 traits to the taxa of interest. Trait information is available in 66% of the cases at the  
363 genus level, and only in 34% of the cases at the species level [55]. The user obtains a  
364 summary table of the different possible ecological traits for each taxon with a  
365 robustness indicator and a confidence range (“possible”, “probable”, and “highly  
366 probable”).

367 The strength of this database is that the provided data are based on the literature  
368 (primary research), or on reference websites or their own collective research  
369 experience if the datum is missing. The authors recommend the use of the UNITE  
370 database for taxonomic assignment and therefore the use of the internal transcribed  
371 spacer (ITS) marker, but it can be easily transposed to data based on the 18S rRNA  
372 marker. It just requires creating a wrapper to make a link between the taxonomy of the  
373 data and FUNGuild to retrieve the traits of interest.

374 A new database called Fun<sup>Fun</sup> [70] is now available. It encompasses 80 fungal  
375 ecological traits. In reality, this database is a FUNGuild database overlay with  
376 information on genetic, enzymatic, morphological, stoichiometric, life history, and  
377 physiological aspects. In addition, the authors mention that Fun<sup>Fun</sup> will be updated in  
378 terms of taxonomy and associated guilds, which is not necessarily the case with  
379 FUNGuild. However, although this database is promising, a lot of information is missing  
380 because it integrates literature data for the first time ever, and its improvement relies  
381 on the progress of research as well as the contribution of scientists. This caused an  
382 impulse leading to a community of scientists proposing a new database: FungalTraits  
383 [71] links information from FUNGuild and Fun<sup>Fun</sup>. It is very complete, and offers  
384 different levels of life styles. Please note that this database includes species from the  
385 fungal kingdom but also fung-like stramenopiles (e.g., the Oomycota phylum). This  
386 may be especially useful because various species are identified as major plant  
387 pathogens within Oomycota. For example, the genus *Phytophthora* gathers several  
388 crop pathogens causing important losses and can represent a risk to global food  
389 security [72].

390 To conclude, the minor drawbacks of FUNGuild, with rare updates or a tool oriented to  
391 ITS sequences, have been offset by the new Fun<sup>Fun</sup> and FungalTraits databases.

392 To complete the tools concerning fungal communities, DEEMY [73] is an information  
393 system only available online and specialized in ectomycorrhizas  
394 (<http://www.deemy.de>). This website references 554 species associated with their  
395 respective symbiotic organisms, including 104 genera. To characterize each species,  
396 a summary sheet provides taxonomic nomenclature, bibliographical references and  
397 photographs, as well as information on morphology, anatomy, potential chemical  
398 reactions, or even ecology traits.

399

#### 400 *FAPROTAX*

401 Functional Annotation of Prokaryotic Taxa (FAPROTAX) [57] is used to assign  
402 metabolic functions, ecological traits or large functional groups relevant to prokaryotes  
403 (Table 2). This database was built manually from the scientific literature of the  
404 *International Journal of Systematic and Evolutionary Microbiology* (IJSEM) and  
405 Bergey's *Manual of Systematic Bacteriology*. It contains about 4,700 unique  
406 prokaryotic taxonomies (mostly at the species level) and 90 functional groups.  
407 FAPROTAX is based on the implicit assignment of a trait / function to a taxon (whether  
408 cultivated or not) if all the cultivated members display this trait / function. Its main  
409 limitation is that it is focused on marine prokaryotic organisms, so that communities  
410 from other biomes can be missing. Another point to be considered is that if the taxa of  
411 interest do not have a species name, the tool cannot draw inferences at the upper  
412 levels (e.g., genus) to assign an ecological trait.

413

#### 414 *IJSEM phenotypic database*

415 IJSEM [74] compiles phenotypic and environmental tolerance data about more than  
416 5,000 bacterial strains. It is an official and unique reference for publishing and  
417 validating new strains. These strains cover about 23 phyla from various habitats  
418 (mainly soils). The database appears as a TSV file  
419 ([https://figshare.com/articles/International\\_Journal\\_of\\_Systematic\\_and\\_Evolutionary\\_](https://figshare.com/articles/International_Journal_of_Systematic_and_Evolutionary_Microbiology_IJSEM_phenotypic_database/4272392)  
420 [Microbiology\\_IJSEM\\_phenotypic\\_database/4272392](https://figshare.com/articles/International_Journal_of_Systematic_and_Evolutionary_Microbiology_IJSEM_phenotypic_database/4272392)), and available information can  
421 be grouped into five categories: ancillary data (e.g., article's digital object identifier;  
422 taxonomic nomenclature), morphology/phenotype (e.g., Gram stain status; motility),

423 metabolism (e.g., BIOLOG information), environmental preferences (e.g., habitat of  
424 isolation; oxygen requirement), and sequence data (e.g., 16S rRNA accession no.).

425

#### 426 BacDive

427 BacDive [75] is one of the largest metadatabases (<https://bacdive.dsmz.de>)  
428 referencing information on bacterial and archaeal diversity (Table 2). The tool links  
429 taxonomy and phenotypic information directly but the database can only be browsed  
430 on a website or data can be downloaded from it. However, it provides a complete  
431 application programming interface (API) to achieve scripts and retrieve the desired  
432 information. In the first months of 2020, it offered data on 81,827 bacterial and archaeal  
433 strains, including 14,091 type strains, and thereby covered approximately 90% of the  
434 described species according to their website. This database is very interesting  
435 because it provides different levels of robust information on taxonomy, morphology,  
436 physiology (API®-tests), molecular data, and cultivation conditions. As for  
437 physiological data, it provides – for example – the main substrates used for culturing a  
438 species and the enzymes present (a link with the EC classification number is available).  
439 These data have been more broadly incorporated into a tool (bacteria-archaea-traits)  
440 that encompasses numerous traits of bacteria and archaea from 26 sources [46].

441

442 To complete this list, a few specialized databases target only one or a few traits. For  
443 example, Engqvist [76] recently grouped the growth temperatures of 21,498 non-  
444 redundant organisms across the whole tree of life. This study showed a strong  
445 correlation between the growth temperature of organisms and enzymatic optima, with  
446 temperature-dependent increases or decreases of enzymatic functions. This  
447 information can be very interesting and complementary to the interpretation of

448 functional inference results, and can be linked – for example – to environmental  
449 conditions.

450

451 4. Application of these new approaches to the functions of the soil microbial  
452 ecosystem

453 4.1. Functional Inference

454 In recent years, meta-omics approaches have been increasingly included in soil  
455 monitoring, whether in fundamental research programs or in more operational projects  
456 [77]. Most studies (about 60% based on keywords in the titles or abstracts of the  
457 publications, see Fig. 7B) have focused on PICRUSt to generate functional predictions  
458 from taxonomic data of the soil microbiota. We summarized the most valuable  
459 outcomes about soils by grouping them into categories: anthropogenic gradient,  
460 agricultural practices, and biogeochemical cycle or soil properties (Fig. 9). For  
461 example, a study showed that plant-bacteria interactions in the rhizosphere were  
462 mainly related to beneficial cooperation [78] involving the release of root exudates by  
463 the plants on the one hand, and hormone production or the ability to break down toxic  
464 chemicals by bacteria on the other hand. Another study investigated the stoichiometric  
465 regulation of soil carbon cycling by comparing functional predictions by metabarcoding  
466 (*via* PICRUSt) and shotgun sequencing on a wide C:N:P soil gradient in a rice field  
467 [60]. A strong correlation was evidenced between the functional predictions from  
468 metabarcoding and metagenomics as regards the abundance of some metabolic  
469 families involved in the C, N and P cycles. Still using PICRUSt, another study examined  
470 the effects of intercropping by predicting the soil microbial functional profiles. It  
471 evidenced that an intercropping system increased the functional potential in terms of  
472 carbon fixation pathways and the citrate cycle [79]. Finally, a study focused on the

473 impact of long-term land-use practices (forest, grassland, crops) on soil bacterial  
474 communities [80] showed that forest soils harbored the largest reservoir of genes,  
475 followed by no-till soils and then grasslands. The plowed soils presented the lowest  
476 functional richness.

477       Based on Tax4Fun predictions, a study investigated the impact of different irrigation  
478 practices with various water qualities (freshwater, treated or untreated wastewater)  
479 along with the different land use systems in drylands [81]. The authors compared the  
480 potential functional and taxonomic profiles of bacteria. Irrigation with wastewater had  
481 an effect on bacterial responses by shaping communities and functional profiles. By  
482 bringing more nitrogen, wastewater favored the response of certain genera, in  
483 particular *Nitrosospira*, and increased the relative abundance of the genes involved in  
484 nitrification and denitrification.

485 Among all the functional inference tools available today, two of them stand out, *i.e.*,  
486 PICRUSt and Tax4Fun. A benchmark study of these tools found no major differences  
487 in terms of performance, especially for soil samples [82]. Another benchmark study  
488 indicated that these two tools provided similar functional profiles but could be  
489 complementary for certain gene families found only in one or the other [83]. Moreover,  
490 the characterization of the fungal functional potential by PICRUSt2 is too recent for us  
491 to have any insights into its robustness concerning soil communities. Compared to trait  
492 assignment, the links between diversity and functions still remain tenuous concerning  
493 certain biogeochemical cycles or the impact of climate change and plant diversity (Fig.  
494 9).

495

496       4.2. Ecological trait assignment



497 The complexity of microbial traits is variable, with simple traits like organic  
498 phosphate utilization, and more complex ones like methanogenesis [24,84]. The  
499 conservation of prokaryotic traits or core genes varies according to phylogenetic depth  
500 [58]. For example, the complex methanogenesis trait appears to be very conserved at  
501 the order and family levels, while contrastingly with the resistance to specific  
502 bacteriophages appears to vary at the species level due to particular point mutations  
503 [24]. Below are a few examples of the possible benefits of ecological traits to the  
504 analysis of the diversity of soil microbial communities (Fig. 9).

505 Regarding the assignment of fungal traits, FUNGuild is currently and by far the most  
506 implemented tool, if not the only tool implemented by ecologists wishing to supplement  
507 their diversity analyses with data on the ecological traits of fungal communities, and  
508 mainly in studies on soil fungal communities [85–88]. A study on fungal communities  
509 in subtropical forest soils highlighted a negative relationship between the abundance  
510 of pathogenic fungi and the phylogenetic diversity of plant communities [89]. Another  
511 study showed a positive correlation between soil fungal community dissimilarities  
512 (plant pathogens, saprotrophs and ectomycorrhizas) and plant phylogenetic distances  
513 in forest soils [90]. Tropical land uses also impact the functional guild. A massive shift  
514 of fungal trophic modes has been showed – notably a decrease in mycorrhizal fungi  
515 and an increase in saprophytic and pathogenic fungi – along with increased  
516 anthropization levels [91]. Interestingly, several large-scale (national or global) studies  
517 have characterized the distribution of trophic types while identifying the environmental  
518 parameters that influence them [85,92–94]. The distribution of these trophic modes  
519 seems to vary greatly depending on temperature and precipitation [94]. This supports  
520 a recent global study focused on the distribution of pathogens and indicating higher  
521 abundance in warm regions [93]. A recent study compared the trophic modes

522 (synonym: life strategies) assigned to the ITS and 18S rDNA molecular markers by  
523 FUNGuild [85]. This study indicated that the saprotroph and pathotroph richness levels  
524 were directly and negatively correlated with the organic matter content and elevation,  
525 and positively correlated with the pH and bulk density. For symbiotroph richness, the  
526 relationship differed depending on the molecular marker used: it was positively  
527 correlated with the C:N ratio when ITS sequences were used, but negatively correlated  
528 when 18S rDNA sequences were used. Similarly, the pH was positively correlated  
529 based on 18S rDNA data, but negatively correlated based on ITS data [85]. These  
530 differences may come from the fact that the two molecular markers do not cover the  
531 same taxonomic range. Therefore, the choice of molecular markers and primers is  
532 essential because it impacts the global picture obtained by possibly enhancing or  
533 decreasing the representation of particular functional groups in the community. For  
534 example, arbuscular mycorrhizal fungi are better represented, in particular the  
535 *Glomeromycota* group, when the 18S rDNA marker is used [95,96]. A study at a  
536 smaller scale also showed that saprotroph richness was directly driven by the soil  
537 physico-chemical parameters and confirmed the results mentioned above. The authors  
538 showed a positive correlation with the pH but a negative one with the C:N ratio [97]. All  
539 these studies used the FUNGuild tool dedicated to characterizing fungal community  
540 traits.

541 Regarding the assignment of bacterial traits, various databases exist but few tools have  
542 been developed to assign ecological traits from metabarcoding datasets. Only  
543 FAPROTAX stands out as a powerful tool for analyzing the functional potential of soil  
544 communities [98], although it is dedicated to marine organisms.

545

546 5. Technical and conceptual limitations and biases

547 The metabarcoding approaches have significant advantages for characterizing  
548 indigenous prokaryotic and eukaryotic microbial communities. Standard protocols now  
549 exist, from sample preparation to bioinformatic and statistical analyses, and scientists  
550 have acquired an important feedback on biases, costs, and efficiency [99–101].

551 A fundamental limitation of functional inference tools, represented by gene gain and  
552 loss, is mainly due to horizontal gene transfer but also gene duplication, gene loss, and  
553 de novo gene birth [102–105], which is addressed in the literature and taken into  
554 account to some extent in these tools. However, horizontal gene transfer remains  
555 difficult to consider accurately for functional prediction, and its influence on microbial  
556 communities is hard to estimate. Moreover, the horizontal gene transfer rate varies  
557 substantially within the tree of life and according to gene families / pathways  
558 [24,84,102]. This process is mainly described in prokaryotes, but is also found to a  
559 lesser extent in eukaryotes, in particular fungi [106]. Microorganisms can gain a  
560 function through plasmid transfer, but no information was found in the literature about  
561 functional prediction [54]. However, plasmids are extrachromosomal DNA molecules  
562 that play a role in the rapid adaptation of microbial communities to environmental  
563 changes across all microbiomes [107,108]. In particular, they are transferred between  
564 phylogenetically distant populations for them to acquire genes and beneficial traits for  
565 their adaptation (e.g., resistance to antibiotics, biocides, pollutants). This is key for all  
566 environments, especially soils where biotic and abiotic fluctuations are tremendous  
567 [109]. The transfer of plasmids is also introduced from phages or viruses into microbial  
568 genomes [110].

569 From a technical point of view, most of the studies on microbial diversity using  
570 metabarcoding approaches are based on the sequencing of one or more hypervariable  
571 regions and remain limited by the size of the amplicon to be sequenced. The most

572 commonly used Illumina sequencing platforms (MiSeq, HiSeq and NovaSeq) can  
573 provide maximum readings of 600 bp (~550 bp after adapter/tag/primer trimming).  
574 Several studies have questioned the most suitable regions for obtaining the best  
575 taxonomic resolution [111,112]; the use of full-length rRNA (~1,800 bp) seems to be  
576 the most appropriate solution [113]. It would significantly enhance phylogenetic  
577 resolution for prokaryotic and eukaryotic microorganisms [114] (Fig. 10, second box).  
578 Short reads do not allow good enough resolution in taxonomic assignment either (*i.e.*,  
579 not down to the species level) although this point is crucial for placing sequences/taxa  
580 in the phylogenetic tree to achieve functional inference. With third-generation HTS  
581 platforms (*e.g.*, PacBio, Oxford Nanopore), full-length molecular markers can be  
582 sequenced, *e.g.*, 16S/18S rRNA genes or the full ITS1 and ITS2 sequences [115,116].  
583 This will considerably improve taxonomic assignment, and make it possible to assign  
584 sequences at the species or even the strain level in certain cases [116]. This way,  
585 functional inference and ecological trait assignment will be improved. However, if the  
586 objective is to obtain the best taxonomic resolution possible, the study of ecological  
587 traits at high taxonomic ranks (*e.g.*, the phylum) remains very promising, especially for  
588 highly conserved traits [117]. For example, the carbon mineralization rate was  
589 positively (*e.g.*, Bacteroidetes) or negatively (*e.g.*, Acidobacteria) correlated with their  
590 relative abundance [118].

591 A good practice complementary to the use of full-length amplicon sequencing would  
592 be the use of amplicon sequence variants (ASVs, also called ZOTUs) to increase the  
593 rate of inference with a better sequence placement on the reference tree [65,119].  
594 Indeed, for those using an OTU clustering approach with a similarity threshold, one  
595 solution would be to use all the sequences within the OTUs instead of one

596 representative sequence for each OTU seed, which could be less accurate. However,  
597 this would also increase the analysis time.

598

## 599 6. Importance of taxonomy and genome references: from accuracy to resolution

600 Many tools use taxonomic data to obtain information about microbial functions  
601 through a metabarcoding approach. Therefore, it is very important to check the  
602 bioinformatic strategy used to analyze the amplicon sequences, from the filtering steps  
603 to OTU clustering or not (see ASV), including taxonomic assignment.

604 The use of tools on ecological traits is highly dependent on taxonomic resolution. For  
605 example, when using FUNGuild, special attention must also be paid to the fact that a  
606 sequence assigned at the genus level may be associated with several trophic types,  
607 and that plant-pathogenic fungi are highly host-specific and may be non-pathogenic in  
608 the context of the study. For the sequences (or OTUs) without any taxonomic  
609 assignment, functions cannot be obtained using tools on ecological traits (Fig. 10,  
610 second box). In order to improve this point, especially for fungal communities,  
611 inferences may be drawn based on phylogeny, as done for bacteria, archaea or  
612 macroorganisms [120–124]. One of the avenues to be explored is the use of ASR tools  
613 such as PICANTE [125] or CASTOR [126], which infer traits for taxa devoid of  
614 ecological data from a phylogenetic tree.

615 Functional inference tools depend on the reference genomes to establish predictions,  
616 so that the accuracy of the results can vary among samples. Samples with well  
617 described host-associated communities such as the human microbiome have many  
618 reference genomes available, and allow good predictive accuracy (Fig. 8, Fig. 10 third  
619 box). Contrastingly, in more complex and highly biodiverse environments like soils  
620 [127], the genomes representing the total taxonomic diversity are much more difficult

621 to obtain. The proportion of cultivable terrestrial strains remains very low  
622 (approximately 25%) compared to the human microbiotas (80%) [128]. Thus, the  
623 results estimated for the communities from complex biomes are approximate and  
624 debatable.

625 In order to improve functional prediction results, it is advisable to provide genomes  
626 specific to the habitat of interest [129]. Considerable efforts have to be made to  
627 increase the number of habitat-specific reference genomes (animal / human, water,  
628 plant, soil), with special attention to the most complex and unknown environments  
629 [130]. Tools to routinely update the databases will also need to be developed [131].  
630 This is an ongoing dynamic at the international scale. For example, the annotation of  
631 reference genomes in databases is not yet representative of soil microbial diversity  
632 [132]. To fill this gap, an effort has been made by creating the Refsoil database (which  
633 does not seem to be maintained ([https://github.com/germs-lab/ref\\_soil](https://github.com/germs-lab/ref_soil))) [132] or a  
634 Refsoil + plasmid database [108].

635

## 636 7. Discussion and future prospects

637 The possible retrieval of a putative functional potential or ecological traits directly  
638 from taxonomic markers and metabarcoding approaches opens new perspectives for  
639 our understanding of microbial communities, both from a fundamental and/or  
640 operational point of view (e.g., functional redundancies, diagnostic tool) [63,133]. This  
641 information can be used to (i) understand the main functions potentially expressed in  
642 a given environment and identify the possible drivers, (ii) examine the distribution of  
643 functions among taxonomic group, or (iii) supplement the classical diversity metrics  
644 used to evaluate the ecological state of environmental matrices (Fig. 10, first box).  
645 Beyond providing an overview of the putative functions of an ecosystem, prediction

646 tools could also provide more detailed information than taxonomic markers do for users  
647 to significantly distinguish sample groups from each other in certain habitats [113] (Fig.  
648 10A, first box).

649 A new generation of tools solves the main limitations of the previous generation tools  
650 by including improvements in terms of taxonomic marker targeting, methodology and  
651 flexibility.

652

### 653 **Future prospects with second-generation tools**

654         Second-generation tools are currently emerging, *e.g.* PICRUSt2 [65], Tax4Fun2  
655 [129] or iVikodak [134] (Fig. 6). Indeed, Langille's team of developers bridged the gap  
656 for the scientific community working on fungal ecology. PICRUSt2 now includes 18S  
657 rDNA and ITS amplicons from the fungal kingdom. Another great improvement is  
658 flexibility: the sequence can be used directly, instead of taxonomy based on  
659 Greengenes nomenclature. Users are no longer dependent on taxonomy to infer  
660 functions; this is a great comfort, and provides better robustness of the analyses.  
661 However, users should be wary of the results because the number of sequenced fungal  
662 genomes currently integrated in the tool is much lower than the number of bacterial  
663 genomes. It is recommended to check the quality score (*e.g.*, NSTI) for the robustness  
664 of the results and interpretation. However, this limitation can be lifted. For example, the  
665 1000 Fungal Genomes Project [135] is aimed at high-quality sequencing and  
666 annotation of fungal genomes so as to build a reference dataset to be used for meta-  
667 omics data analysis.

668 Another downside of these tools is the absence of data support for micro-eukaryotic  
669 communities, which are essential to the soil ecosystem. Protists are abundant and  
670 diverse, with a large range of functional diversity, and are highly involved in soil food

671 webs and functioning [136,137]. It would be particularly useful to develop tools  
672 dedicated to protists from data on ecological traits available in the literature [138].

673

#### 674 **Challenges: from fundamental research to diagnosis**

675         Switching from fundamental research to practical applications would be really  
676 interesting because although operational microbial diversity bioindicators are  
677 increasingly emerging, there is a huge gap in the functional information of microbial  
678 communities. Even if the number of species can be an indicator of the impact of biotic  
679 and abiotic factors [139,140], the need to characterize the associated functions at the  
680 ecosystem level has become obvious to obtain a complete diagnosis with functional  
681 information on the soil microbial quality [141,142].

682 **As regards human health, identifying taxonomic and functional changes to estimate**  
683 **the contributions of taxa associated with a disease is an emerging topic [143], as for**  
684 **example in research into gene markers involved in colorectal or oral cancers [144,145].**  
685 **Some interesting examples exist in the biomonitoring and bioassessment of water**  
686 **quality [146,147] but examples for the soil microbial quality are still scarce.** The huge  
687 complexity and diversity of the soil microbial community probably still limits such  
688 applications to the soil ecosystem, along with a lack of genome references. However,  
689 initiatives at the global level are in progress to access the soil biodiversity using  
690 taxonomic, functional and environmental data [140]. We can also note that a real  
691 dynamic seems to be developing at the international scale to collect, standardize and  
692 disseminate traits through the tree of life via an open science tool called the Open  
693 Traits Network (OTN) [83].

694



695 The huge complexity and diversity of the soil microbial community probably still limits  
696 such applications to the soil ecosystem, along with a lack of genome references.  
697 However, initiatives at the global level are in progress to access the soil biodiversity  
698 using taxonomic, functional and environmental data [148]. We can also note that a real  
699 dynamic seems to be developing at the international scale to collect, standardize and  
700 disseminate traits through the tree of life *via* an open science tool called the Open  
701 Traits Network (OTN) [83].

702 To our knowledge, providing robust and operational indicators based on putative  
703 functions derived from metabarcoding data is impossible today. The main challenges  
704 are to (i) aggregate and summarize the mass of data currently generated, (ii) test the  
705 predictions on datasets and compare them with “real” functional measurements, (iii)  
706 validate these indicators on datasets under diverse experimental conditions (*e.g.*, land  
707 use gradient, agricultural practices) at the local and global scales, and (iv) develop  
708 representative repositories to ensure the validity of the diagnosis made from these new  
709 tools.

710 Regarding aggregation and data reduction [(i)], a track would be to use a constrained  
711 non-negative matrix factorization approach [149], an alternative to the concept of  
712 community-aggregated traits (CATs) [150]. This method has already been used to  
713 aggregate functional traits from meta-genomes [149]. The authors demonstrated that  
714 significant data reduction made it possible to propose simple models to describe a set  
715 of complex functions at the scale of an ecosystem (here the potential for fiber  
716 degradation in the human intestinal microbiota) while preserving biological data quality  
717 [149]. Concerning [(ii)], it will be interesting, for example, to confront functional  
718 predictions with volatile organic compound (VOCs) emissions or microbial respiration  
719 rates from soil measurements. **Indeed, the very diverse microbial VOCs are secondary**

720 metabolites playing various roles in particular making it possible to carry out more or  
721 less long-distance interactions and communication (e.g., growth, motility, antibiotic  
722 resistance, expression of stress response genes) [151]. Moreover, to suggest these  
723 tools as robust indicators of the soil quality [(iii)], it will be essential to use large datasets  
724 in order to determine the best metrics (e.g., functional richness, relative gene  
725 abundance, aggregation of traits) and the most sensitive genes or groups of genes  
726 depending on the various scientific issues. Once these limitations have been lifted,  
727 these tools will provide results of great interest to the scientific community at relatively  
728 affordable human, technological and financial costs. However, maintaining the  
729 associated scientific expertise will be essential to support their transfer for operational  
730 applications and avoid erroneous interpretations that could potentially have disastrous  
731 consequences for soil users and soil policy makers [(iv)]. For example, interpreting  
732 trophic types requires strong expertise, with particular attention to the exploitation of  
733 potential pathogenicity information – a highly sensible task. The responses of the traits  
734 vary according to the disturbances applied to the ecosystem [152], and the results must  
735 be contextualized to ensure correct interpretation.

736

## 737 **Conclusion**

738 The exploration of the microbial functional diversity based on taxonomic marker genes  
739 in order to improve our knowledge of microbial diversity and functions is just starting.  
740 As highlighted in this review, various solutions have emerged over a number of years  
741 and are being improved quickly thanks to technological advances. Functional inference  
742 results are already robust and representative for some ecosystems with low diversity  
743 (specific richness) and with well characterized genomes such as the human  
744 microbiotas. Progress now needs to be made for more complex environments. The

745 upcoming challenge, notably for environmental samples, will be to establish the link  
746 between functional predictions on reference datasets and environmental  
747 measurements. The new network SoilBON dedicated to monitoring soil biodiversity  
748 and functional ecosystems at a global scale, with particular attention to microbial  
749 diversity, is a step in this direction [3]. This ambitious framework aims to collect and  
750 analyze soil diversity based on soil ecological indicators (*i.e.*, essential biodiversity  
751 variables [153]). One purpose of this framework is to inform policy makers and  
752 stakeholders for them to adapt measures and preserve this biodiversity.

753

#### 754 **Abbreviations**

755 DNA: Deoxyribonucleic acid; qPCR: quantitative polymerase chain reaction; HTS:  
756 high-throughput sequencing; rDNA ribosomal DNA; rRNA: ribosomal ribonucleic acid;  
757 SRA: sequence read archive; NCBI: National Center for Biotechnology Information;  
758 RDP: Ribosomal Database Project; ITS: internal transcribed spacer; INSD:  
759 International Nucleotide Sequence Database; JGI: Joint Genome Institute; KEGG:  
760 Kyoto Encyclopedia of Genes and Genomes; CAZy: carbohydrate-active enzymes;  
761 NLP: natural language processing; OTU: operational taxonomic unit; GCN: gene copy  
762 number; NSTI: nearest sequenced taxon index; FTU: fraction of OTUs; EC number:  
763 enzyme commission number; COG: cluster of orthologous groups; KO: KEGG  
764 orthology; IJSEM: *International Journal of Systematic and Evolutionary Microbiology*;  
765 API: application programming interface; C, N and P cycles: carbon, nitrogen and  
766 phosphorus cycles; bp: base pairs; ASV: amplicon sequence variant; ZOTU: zero-  
767 radius OTU; OTN: open traits network; CAT: community-aggregated trait. **VOC:**  
768 **Volatile Organic Compound.**

769

770 **Competing interests**

771 The authors declare that they have no competing interests.

772

773 **Funding**

774 This work was funded by the ADEME (French Environment and Energy Management  
775 Agency).

776

777 **Author contributions**

778 C.D and L.R conceptualized the manuscript. C.D drafted the manuscript with  
779 contributions from S.T, S.D, A.C, P-A.M and L.R. All authors read and approved the  
780 final manuscript.

781

782 **Acknowledgements**

783 Thanks to Annie Buchwalter for correction and improvement of English language in the  
784 manuscript.

785

786 **References**

787 1. Cavicchioli R, Ripple WJ, Timmis KN, Azam F, Bakken LR, Baylis M, et al.

788 Scientists' warning to humanity: microorganisms and climate change. Nat Rev

789 Microbiol [Internet]. 2019;17:569–86. Available from:

790 <http://www.embase.com/search/results?subaction=viewrecord&from=export&id=L628>

791 [318774%0Ahttp://dx.doi.org/10.1038/s41579-019-0222-5](http://dx.doi.org/10.1038/s41579-019-0222-5)

792 2. Maron PA, Mougél C, Ranjard L. Soil microbial diversity: Methodological strategy,

793 spatial overview and functional interest. Comptes Rendus - Biol [Internet]. Academie

794 des sciences; 2011;334:403–11. Available from:

795 <http://dx.doi.org/10.1016/j.crv.2010.12.003>

796 3. Guerra CA, Bardgett RD, Caon L, Crowther TW, Delgado-Baquerizo M,  
797 Montanarella L, et al. Tracking, targeting, and conserving soil biodiversity: A  
798 monitoring and indicator system can inform policy. *Science* (80- ) [Internet].  
799 2021;371:239–41. Available from:  
800 <https://www.sciencemag.org/lookup/doi/10.1126/science.abd7926>

801 4. Bardgett RD, Van Der Putten WH. Belowground biodiversity and ecosystem  
802 functioning. *Nature* [Internet]. 2014;515:505–11. Available from:  
803 <http://www.nature.com/articles/nature13855>

804 5. Rivett DW, Bell T. Abundance determines the functional role of bacterial  
805 phylotypes in complex communities. *Nat Microbiol* [Internet]. 2018;3:767–72.  
806 Available from: <http://www.nature.com/articles/s41564-018-0180-0>

807 6. Antwis RE, Griffiths SM, Harrison XA, Aranega-Bou P, Arce A, Bettridge AS, et al.  
808 Fifty important research questions in microbial ecology. *FEMS Microbiol Ecol*  
809 [Internet]. 2017;93. Available from: [https://academic.oup.com/femsec/article-](https://academic.oup.com/femsec/article-lookup/doi/10.1093/femsec/fix044)  
810 [lookup/doi/10.1093/femsec/fix044](https://academic.oup.com/femsec/article-lookup/doi/10.1093/femsec/fix044)

811 7. Sergaki C, Lagunas B, Lidbury I, Gifford ML, Schäfer P. Challenges and  
812 Approaches in Microbiome Research: From Fundamental to Applied. *Front Plant Sci*  
813 [Internet]. 2018;9:1–12. Available from:  
814 <https://www.frontiersin.org/article/10.3389/fpls.2018.01205/full>

815 8. Starr AE, Deeke SA, Li L, Zhang X, Daoud R, Ryan J, et al. Proteomic and  
816 Metaproteomic Approaches to Understand Host-Microbe Interactions. *Anal Chem*  
817 [Internet]. 2018;90:86–109. Available from:  
818 <https://pubs.acs.org/doi/10.1021/acs.analchem.7b04340>

819 9. Aldridge BB, Rhee KY. Microbial metabolomics: Innovation, application, insight.

820 Curr Opin Microbiol [Internet]. 2014;19:90–6. Available from:  
821 <https://linkinghub.elsevier.com/retrieve/pii/S1369527414000794>

822 10. Knight R, Vrbanac A, Taylor BC, Aksenov A, Callewaert C, Debelius J, et al. Best  
823 practices for analysing microbiomes. Nat Rev Microbiol [Internet]. 2018;16:410–22.  
824 Available from: <http://www.nature.com/articles/s41579-018-0029-9>

825 11. Porter TM, Hajibabaei M. Scaling up: A guide to high-throughput genomic  
826 approaches for biodiversity analysis. Mol Ecol. 2018;27:313–38.

827 12. Mehle N, Dreo T. Quantitative Analysis with Droplet Digital PCR. Notes Greek  
828 Text Genes [Internet]. 2019. p. 171–86. Available from:  
829 [http://link.springer.com/10.1007/978-1-4939-8837-2\\_14](http://link.springer.com/10.1007/978-1-4939-8837-2_14)

830 13. Thiele-Bruhn S, Schloter M, Wilke BM, Beaudette LA, Martin-Laurent F, Cheviron  
831 N, et al. Identification of new microbial functional standards for soil quality  
832 assessment. Soil [Internet]. 2020;6:17–34. Available from:  
833 <https://soil.copernicus.org/articles/6/17/2020/>

834 14. Sessitsch A, Hackl E, Wenzl P, Kilian A, Kostic T, Stralis-Pavese N, et al.  
835 Diagnostic microbial microarrays in soil ecology. New Phytol. 2006;171:719–36.

836 15. He Z, Gentry TJ, Schadt CW, Wu L, Liebich J, Chong SC, et al. GeoChip: A  
837 comprehensive microarray for investigating biogeochemical, ecological and  
838 environmental processes. ISME J. 2007;1:67–77.

839 16. Lee YJ, Van Nostrand JD, Tu Q, Lu Z, Cheng L, Yuan T, et al. The PathoChip, a  
840 functional gene array for assessing pathogenic properties of diverse microbial  
841 communities. ISME J [Internet]. Nature Publishing Group; 2013;7:1974–84. Available  
842 from: <http://dx.doi.org/10.1038/ismej.2013.88>

843 17. Zhou A, He Z, Qin Y, Lu Z, Deng Y, Tu Q, et al. StressChip as a high-throughput  
844 tool for assessing microbial community responses to environmental stresses. Environ

845 Sci Technol. 2013;47:9841–9.

846 18. Abot A, Arnal G, Auer L, Lazuka A, Labourdette D, Lamarre S, et al. CAZyChip:  
847 dynamic assessment of exploration of glycoside hydrolases in microbial ecosystems.  
848 BMC Genomics [Internet]. BMC Genomics; 2016;17:671. Available from:  
849 <http://www.ncbi.nlm.nih.gov/pubmed/27552843>  
850 [http://www.pubmedcentral.nih.g  
ov/articlerender.fcgi?artid=PMC4994258](http://www.pubmedcentral.nih.gov/articlerender.fcgi?artid=PMC4994258)

851 19. Tedersoo L, Drenkhan R, Anslan S, Morales-Rodriguez C, Cleary M. High-  
852 throughput identification and diagnostics of pathogens and pests: Overview and  
853 practical recommendations. Mol Ecol Resour [Internet]. 2019;19:47–76. Available  
854 from: <https://onlinelibrary.wiley.com/doi/abs/10.1111/1755-0998.12959>

855 20. Franzosa E a., Hsu T, Sirota-Madi A, Shafquat A, Abu-Ali G, Morgan XC, et al.  
856 Sequencing and beyond: integrating molecular “omics” for microbial community  
857 profiling. Nat Rev Microbiol [Internet]. Nature Publishing Group; 2015;13:360–72.  
858 Available from:  
859 <http://www.nature.com/doi/abs/10.1038/nrmicro3451>  
860 [http://www.ncbi.nlm.nih.g  
ov/pubmed/25915636](http://www.ncbi.nlm.nih.gov/pubmed/25915636)

861 21. Segata N, Boernigen D, Tickle TL, Morgan XC, Garrett WS, Huttenhower C.  
862 Computational meta’omics for microbial community studies. Mol Syst Biol [Internet].  
863 Nature Publishing Group; 2013;9:1–15. Available from:  
864 <http://dx.doi.org/10.1038/msb.2013.22>

865 22. Frioux C, Singh D, Korcsmaros T, Hildebrand F. From bag-of-genes to bag-of-  
866 genomes: metabolic modelling of communities in the era of metagenome-assembled  
867 genomes. Comput Struct Biotechnol J [Internet]. 2020;18:1722–34. Available from:  
868 <https://linkinghub.elsevier.com/retrieve/pii/S2001037020303172>

869 23. Fierer N. Embracing the unknown: Disentangling the complexities of the soil

870 microbiome. *Nat Rev Microbiol* [Internet]. Nature Publishing Group; 2017;15:579–90.  
871 Available from: <http://dx.doi.org/10.1038/nrmicro.2017.87>

872 24. Martiny JBH, Jones SE, Lennon JT, Martiny AC. Microbiomes in light of traits: A  
873 phylogenetic perspective. *Science* (80- ) [Internet]. 2015;350:aac9323–aac9323.  
874 Available from: <https://www.sciencemag.org/lookup/doi/10.1126/science.aac9323>

875 25. Penton CR, Johnson TA, Quensen JF, Iwai S, Cole JR, Tiedje JM. Functional  
876 genes to assess nitrogen cycling and aromatic hydrocarbon degradation: primers and  
877 processing matter. *Front Microbiol* [Internet]. 2013;4. Available from:  
878 <http://journal.frontiersin.org/article/10.3389/fmicb.2013.00279/abstract>

879 26. Hannula SE, van Veen JA. Primer sets developed for functional genes reveal  
880 shifts in functionality of fungal community in soils. *Front Microbiol*. 2016;7.

881 27. Barbi F, Bragalini C, Vallon L, Prudent E, Dubost A, Fraissinet-Tachet L, et al.  
882 PCR primers to study the diversity of expressed fungal genes encoding  
883 lignocellulolytic enzymes in soils using high-throughput sequencing. *PLoS One*  
884 [Internet]. 2014 [cited 2015 Jan 5];9:e116264. Available from:  
885 <http://journals.plos.org/plosone/article?id=10.1371/journal.pone.0116264#pone->  
886 [0116264-g004](http://journals.plos.org/plosone/article?id=10.1371/journal.pone.0116264#pone-0116264-g004)

887 28. Fish JA, Chai B, Wang Q, Sun Y, Brown CT, Tiedje JM, et al. FunGene: the  
888 functional gene pipeline and repository. *Front Microbiol* [Internet]. 2013;4. Available  
889 from: <http://journal.frontiersin.org/article/10.3389/fmicb.2013.00291/abstract>

890 29. Angel R, Nepel M, Panhölzl C, Schmidt H, Herbold CW, Eichorst SA, et al.  
891 Evaluation of primers targeting the diazotroph functional gene and development of  
892 NifMAP - A bioinformatics pipeline for analyzing nifH amplicon data. *Front Microbiol*  
893 [Internet]. 2018;9. Available from:  
894 <http://journal.frontiersin.org/article/10.3389/fmicb.2018.00703/full>



895 30. Ortiz-Estrada AM, Gollas-Galván T, Martínez-Córdova LR, Martínez-Porchas M.  
896 Predictive functional profiles using metagenomic 16S rRNA data: a novel approach to  
897 understanding the microbial ecology of aquaculture systems. *Rev Aquac* [Internet].  
898 2019;11:234–45. Available from: <http://doi.wiley.com/10.1111/raq.12237>

899 31. Bahram M, Hildebrand F, Forslund SK, Anderson JL, Soudzilovskaia NA,  
900 Bodegom PM, et al. Structure and function of the global topsoil microbiome. *Nature*  
901 [Internet]. 2018;560:233–7. Available from: [http://www.nature.com/articles/s41586-](http://www.nature.com/articles/s41586-018-0386-6)  
902 018-0386-6

903 32. Hahn AS, Konwar KM, Louca S, Hanson NW, Hallam SJ. The information  
904 science of microbial ecology. *Curr Opin Microbiol* [Internet]. 2016;31:209–16.  
905 Available from: <https://linkinghub.elsevier.com/retrieve/pii/S1369527416300492>

906 33. Farley SS, Dawson A, Goring SJ, Williams JW. Situating ecology as a big-data  
907 science: Current advances, challenges, and solutions. *Bioscience*. 2018;68:563–76.

908 34. Caspi R, Billington R, Keseler IM, Kothari A, Krummenacker M, Midford PE, et al.  
909 The MetaCyc database of metabolic pathways and enzymes - a 2019 update.  
910 *Nucleic Acids Res* [Internet]. 2020;48:D445–53. Available from:  
911 <https://academic.oup.com/nar/article/48/D1/D445/5581728>

912 35. Kanehisa M, Sato Y, Kawashima M, Furumichi M, Tanabe M. KEGG as a  
913 reference resource for gene and protein annotation. *Nucleic Acids Res*.  
914 2016;44:D457–62.

915 36. Lombard V, Golaconda Ramulu H, Drula E, Coutinho PM, Henrissat B. The  
916 carbohydrate-active enzymes database (CAZy) in 2013. *Nucleic Acids Res* [Internet].  
917 2014 [cited 2014 Jul 10];42:D490-5. Available from:  
918 [http://www.pubmedcentral.nih.gov/articlerender.fcgi?artid=3965031&tool=pmcentrez](http://www.pubmedcentral.nih.gov/articlerender.fcgi?artid=3965031&tool=pmcentrez&rendertype=abstract)  
919 &rendertype=abstract

920 37. Starke R, Capek P, Morais D, Callister SJ, Jehmlich N. The total microbiome  
921 functions in bacteria and fungi. *J Proteomics* [Internet]. 2020;213:103623. Available  
922 from: <https://linkinghub.elsevier.com/retrieve/pii/S1874391919303951>

923 38. Commichaux S, Shah N, Ghurye J, Stoppel A, Goodheart JA, Luque GG, et al. A  
924 critical assessment of gene catalogs for metagenomic analysis. Birol I, editor.  
925 *Bioinformatics* [Internet]. 2021; Available from:  
926 [https://academic.oup.com/bioinformatics/advance-](https://academic.oup.com/bioinformatics/advance-article/doi/10.1093/bioinformatics/btab216/6207961)  
927 [article/doi/10.1093/bioinformatics/btab216/6207961](https://academic.oup.com/bioinformatics/advance-article/doi/10.1093/bioinformatics/btab216/6207961)

928 39. Zhou Y, Coventry DR, Gupta VVSR, Fuentes D, Merchant A, Kaiser BN, et al.  
929 The preceding root system drives the composition and function of the rhizosphere  
930 microbiome. *Genome Biol* [Internet]. 2020;21:89. Available from:  
931 <https://genomebiology.biomedcentral.com/articles/10.1186/s13059-020-01999-0>

932 40. Baldrian P. The known and the unknown in soil microbial ecology. *FEMS*  
933 *Microbiol Ecol* [Internet]. 2019;95. Available from:  
934 <https://academic.oup.com/femsec/article/doi/10.1093/femsec/fiz005/5281230>

935 41. Blondel J. Guilds or functional groups: Does it matter? *Oikos* [Internet].  
936 2003;100:223–31. Available from: [http://doi.wiley.com/10.1034/j.1600-](http://doi.wiley.com/10.1034/j.1600-0706.2003.12152.x)  
937 [0706.2003.12152.x](http://doi.wiley.com/10.1034/j.1600-0706.2003.12152.x)

938 42. Mlambo MC. Not all traits are “functional”: Insights from taxonomy and  
939 biodiversity-ecosystem functioning research. *Biodivers Conserv* [Internet].  
940 2014;23:781–90. Available from: <http://link.springer.com/10.1007/s10531-014-0618-5>

941 43. Voltaire F, Gleason SM, Delzon S. What do you mean “functional” in ecology?  
942 Patterns versus processes. *Ecol Evol* [Internet]. 2020;10:11875–85. Available from:  
943 <https://onlinelibrary.wiley.com/doi/10.1002/ece3.6781>

944 44. Escalas A, Hale L, Voordeckers JW, Yang Y, Firestone MK, Alvarez-Cohen L, et

945 al. Microbial functional diversity: From concepts to applications. *Ecol Evol* [Internet].  
946 2019;9:12000–16. Available from:  
947 <https://onlinelibrary.wiley.com/doi/abs/10.1002/ece3.5670>

948 45. Malik AA, Martiny JBH, Brodie EL, Martiny AC, Treseder KK, Allison SD. Defining  
949 trait-based microbial strategies with consequences for soil carbon cycling under  
950 climate change. *ISME J* [Internet]. 2020;14:1–9. Available from:  
951 <http://www.nature.com/articles/s41396-019-0510-0>

952 46. Madin JS, Nielsen DA, Brbic M, Corkrey R, Danko D, Edwards K, et al. A  
953 synthesis of bacterial and archaeal phenotypic trait data. *Sci Data* [Internet].  
954 2020;7:170. Available from: <http://www.nature.com/articles/s41597-020-0497-4>

955 47. Lajoie G, Kembel SW. Making the Most of Trait-Based Approaches for Microbial  
956 Ecology. *Trends Microbiol* [Internet]. 2019;27:814–23. Available from:  
957 <https://linkinghub.elsevier.com/retrieve/pii/S0966842X19301581>

958 48. Reimer LC, Söhnngen C, Vetcininoва A, Overmann J. Mobilization and integration  
959 of bacterial phenotypic data—Enabling next generation biodiversity analysis through  
960 the Bac Dive metadatabase. *J Biotechnol* [Internet]. 2017;261:187–93. Available  
961 from: <https://linkinghub.elsevier.com/retrieve/pii/S0168165617302067>

962 49. Endara L, Cui H, Burleigh JG. Extraction of phenotypic traits from taxonomic  
963 descriptions for the tree of life using natural language processing. *Appl Plant Sci*  
964 [Internet]. 2018;6:e1035. Available from: <http://doi.wiley.com/10.1002/aps3.1035>

965 50. Lim KMK, Li C, Chng KR, Nagarajan N. @MInter: Automated text-mining of  
966 microbial interactions. *Bioinformatics* [Internet]. 2016;32:2981–7. Available from:  
967 [https://academic.oup.com/bioinformatics/article-](https://academic.oup.com/bioinformatics/article-lookup/doi/10.1093/bioinformatics/btw357)  
968 [lookup/doi/10.1093/bioinformatics/btw357](https://academic.oup.com/bioinformatics/article-lookup/doi/10.1093/bioinformatics/btw357)

969 51. Chaix E, Deléger L, Bossy R, Nédellec C. Text mining tools for extracting

970 information about microbial biodiversity in food. *Food Microbiol* [Internet].  
971 2019;81:63–75. Available from:  
972 <https://linkinghub.elsevier.com/retrieve/pii/S0740002017310638>

973 52. Chibucos MC, Zweifel AE, Herrera JC, Meza W, Eslamfam S, Uetz P, et al. An  
974 ontology for microbial phenotypes. *BMC Microbiol* [Internet]. 2014;14:294. Available  
975 from: <http://bmcmicrobiol.biomedcentral.com/articles/10.1186/s12866-014-0294-3>

976 53. Brbić M, Piškorec M, Vidulin V, Kriško A, Šmuc T, Supek F. Phenotype Inference  
977 from Text and Genomic Data. *Lect Notes Comput Sci (including Subser Lect Notes*  
978 *Artif Intell Lect Notes Bioinformatics)* [Internet]. 2017. p. 373–7. Available from:  
979 [http://link.springer.com/10.1007/978-3-319-71273-4\\_34](http://link.springer.com/10.1007/978-3-319-71273-4_34)

980 54. Langille MG, Zaneveld J, Caporaso JG, McDonald D, Knights D, Reyes JA, et al.  
981 Predictive functional profiling of microbial communities using 16S rRNA marker gene  
982 sequences. *Nat Biotechnol* [Internet]. 2013;31:814–21. Available from:  
983 <http://www.ncbi.nlm.nih.gov/pubmed/23975157>

984 55. Nguyen NH, Song Z, Bates ST, Branco S, Tedersoo L, Menke J, et al. FUNGuild:  
985 An open annotation tool for parsing fungal community datasets by ecological guild.  
986 *Fungal Ecol* [Internet]. Elsevier Ltd; 2016;20:241–8. Available from:  
987 <http://dx.doi.org/10.1016/j.funeco.2015.06.006>

988 56. Aßhauer KP, Wemheuer B, Daniel R, Meinicke P. Tax4Fun: Predicting functional  
989 profiles from metagenomic 16S rRNA data. *Bioinformatics* [Internet]. 2015 [cited 2015  
990 May 13];31:2882–4. Available from:  
991 <http://www.pubmedcentral.nih.gov/articlerender.fcgi?artid=4547618&tool=pmcentrez>  
992  [&rendertype=abstract](http://www.pubmedcentral.nih.gov/articlerender.fcgi?artid=4547618&tool=pmcentrez&rendertype=abstract)

993 57. Louca S, Parfrey LW, Doebeli M. Decoupling function and taxonomy in the global  
994 ocean microbiome. *Science (80- )* [Internet]. 2016;353:1272–7. Available from:

995 <https://www.sciencemag.org/lookup/doi/10.1126/science.aaf4507>

996 58. Segata N, Huttenhower C. Toward an Efficient Method of Identifying Core Genes  
997 for Evolutionary and Functional Microbial Phylogenies. Gibas C, editor. PLoS One  
998 [Internet]. 2011;6:e24704. Available from:  
999 <https://dx.plos.org/10.1371/journal.pone.0024704>

1000 59. Snel B, Bork P, Huynen MA. Genome phylogeny based on gene content. Nat  
1001 Genet [Internet]. 1999;21:108–10. Available from:  
1002 [http://www.nature.com/articles/ng0199\\_108](http://www.nature.com/articles/ng0199_108)

1003 60. Hartman WH, Ye R, Horwath WR, Tringe SG. A genomic perspective on  
1004 stoichiometric regulation of soil carbon cycling. ISME J [Internet]. 2017;11:2652–65.  
1005 Available from: <http://www.nature.com/articles/ismej2017115>

1006 61. Kembel SW, Wu M, Eisen JA, Green JL. Incorporating 16S Gene Copy Number  
1007 Information Improves Estimates of Microbial Diversity and Abundance. von Mering C,  
1008 editor. PLoS Comput Biol [Internet]. 2012;8:e1002743. Available from:  
1009 <https://dx.plos.org/10.1371/journal.pcbi.1002743>

1010 62. Louca S, Doebeli M, Parfrey LW. Correcting for 16S rRNA gene copy numbers in  
1011 microbiome surveys remains an unsolved problem. Microbiome [Internet]. 2018;6:41.  
1012 Available from:  
1013 [http://www.embase.com/search/results?subaction=viewrecord&from=export&id=L620](http://www.embase.com/search/results?subaction=viewrecord&from=export&id=L620952556%0Ahttp://dx.doi.org/10.1186/s40168-018-0420-9)  
1014 [952556%0Ahttp://dx.doi.org/10.1186/s40168-018-0420-9](http://dx.doi.org/10.1186/s40168-018-0420-9)

1015 63. Woloszynek S, Mell JC, Zhao Z, Simpson G, O'Connor MP, Rosen GL. Exploring  
1016 thematic structure and predicted functionality of 16S rRNA amplicon data. Loor JJ,  
1017 editor. PLoS One [Internet]. 2019;14:e0219235. Available from:  
1018 <https://dx.plos.org/10.1371/journal.pone.0219235>

1019 64. Dhariwal A, Chong J, Habib S, King IL, Agellon LB, Xia J. MicrobiomeAnalyst: a

1020 web-based tool for comprehensive statistical, visual and meta-analysis of microbiome  
1021 data. *Nucleic Acids Res* [Internet]. 2017;45:W180–8. Available from:  
1022 <https://academic.oup.com/nar/article-lookup/doi/10.1093/nar/gkx295>  
1023 65. Douglas GM, Maffei VJ, Zaneveld JR, Yurgel SN, Brown JR, Taylor CM, et al.  
1024 PICRUSt2 for prediction of metagenome functions. *Nat Biotechnol* [Internet].  
1025 2020;38:685–8. Available from: <http://www.nature.com/articles/s41587-020-0548-6>  
1026 66. Bowman JS, Ducklow HW. Microbial communities can be described by metabolic  
1027 structure: A general framework and application to a seasonally variable, depth-  
1028 stratified microbial community from the coastal West Antarctic Peninsula. *PLoS One*.  
1029 2015;10:1–18.  
1030 67. R Core Team. R: A Language and Environment for Statistical Computing  
1031 [Internet]. Vienna, Austria; 2020. Available from: <https://www.r-project.org/>  
1032 68. Iwai S, Weinmaier T, Schmidt BL, Albertson DG, Poloso NJ, Dabbagh K, et al.  
1033 Piphillin: Improved Prediction of Metagenomic Content by Direct Inference from  
1034 Human Microbiomes. He Z, editor. *PLoS One* [Internet]. 2016;11:e0166104.  
1035 Available from: <https://dx.plos.org/10.1371/journal.pone.0166104>  
1036 69. Mitchell K, Ronas J, Dao C, Freise AC, Mangul S, Shapiro C, et al. PUMAA: A  
1037 Platform for Accessible Microbiome Analysis in the Undergraduate Classroom. *Front*  
1038 *Microbiol* [Internet]. 2020;11. Available from:  
1039 <https://www.frontiersin.org/article/10.3389/fmicb.2020.584699/full>  
1040 70. Zanne AE, Abarenkov K, Afkhami ME, Aguilar-Trigueros CA, Bates S, Bhatnagar  
1041 JM, et al. Fungal functional ecology: bringing a trait-based approach to plant-  
1042 associated fungi. *Biol Rev* [Internet]. 2020;95:409–33. Available from:  
1043 <https://onlinelibrary.wiley.com/doi/abs/10.1111/brv.12570>  
1044 71. Pölme S, Abarenkov K, Henrik Nilsson R, Lindahl BD, Clemmensen KE,

1045 Kauserud H, et al. FungalTraits: a user-friendly traits database of fungi and fungus-  
1046 like stramenopiles. *Fungal Divers* [Internet]. 2020;105:1–16. Available from:  
1047 <http://link.springer.com/10.1007/s13225-020-00466-2>

1048 72. Fones HN, Beber DP, Chaloner TM, Kay WT, Steinberg G, Gurr SJ. Threats to  
1049 global food security from emerging fungal and oomycete crop pathogens. *Nat Food*  
1050 [Internet]. 2020;1:332–42. Available from: [http://www.nature.com/articles/s43016-](http://www.nature.com/articles/s43016-020-0075-0)  
1051 [020-0075-0](http://www.nature.com/articles/s43016-020-0075-0)

1052 73. Agerer R, Rambold G. DEEMY—an information system for characterization and  
1053 determination of ectomycorrhizae. München, Ger [Internet]. 2004; Available from:  
1054 <http://www.deemy.de/>

1055 74. Barberán A, Caceres Velazquez H, Jones S, Fierer N. Hiding in Plain Sight:  
1056 Mining Bacterial Species Records for Phenotypic Trait Information. Hallam SJ, editor.  
1057 *mSphere* [Internet]. 2017;2. Available from:  
1058 <https://msphere.asm.org/content/2/4/e00237-17>

1059 75. Reimer LC, Vetschinova A, Carbasse JS, Söhngen C, Gleim D, Ebeling C, et al.  
1060 Bac Dive in 2019: bacterial phenotypic data for High-throughput biodiversity analysis.  
1061 *Nucleic Acids Res* [Internet]. 2019;47:D631–6. Available from:  
1062 <https://academic.oup.com/nar/article/47/D1/D631/5106998>

1063 76. Engqvist MKM. Correlating enzyme annotations with a large set of microbial  
1064 growth temperatures reveals metabolic adaptations to growth at diverse  
1065 temperatures. *BMC Microbiol* [Internet]. 2018;18:177. Available from:  
1066 <https://bmcmicrobiol.biomedcentral.com/articles/10.1186/s12866-018-1320-7>

1067 77. Nkongolo KK, Narendrula-Kotha R. Advances in monitoring soil microbial  
1068 community dynamic and function. *J Appl Genet* [Internet]. 2020;61:249–63. Available  
1069 from: <http://link.springer.com/10.1007/s13353-020-00549-5>

1070 78. Jin T, Wang Y, Huang Y, Xu J, Zhang P, Wang N, et al. Taxonomic structure and  
1071 functional association of foxtail millet root microbiome. *Gigascience*. 2017;6:1–12.

1072 79. Lian T, Mu Y, Jin J, Ma Q, Cheng Y, Cai Z, et al. Impact of intercropping on the  
1073 coupling between soil microbial community structure, activity, and nutrient-use  
1074 efficiencies. *PeerJ* [Internet]. 2019;7:e6412. Available from:  
1075 <https://peerj.com/articles/6412>

1076 80. Sengupta A, Hariharan J, Grewal PS, Dick WA. Bacterial community dissimilarity  
1077 in soils is driven by long-term land-use practices. *Agrosystems, Geosci Environ*.  
1078 2020;3.

1079 81. Lüneberg K, Schneider D, Siebe C, Daniel R. Drylands soil bacterial community  
1080 is affected by land use change and different irrigation practices in the Mezquital  
1081 Valley, Mexico. *Sci Rep* [Internet]. 2018;8:1413. Available from:  
1082 <http://www.nature.com/articles/s41598-018-19743-x>

1083 82. Sun S, Jones RB, Fodor AA. Inference-based accuracy of metagenome  
1084 prediction tools varies across sample types and functional categories. *Microbiome*  
1085 [Internet]. 2020;8:46. Available from:  
1086 <https://microbiomejournal.biomedcentral.com/articles/10.1186/s40168-020-00815-y>

1087 83. Koo H, Hakim JA, Morrow CD, Eipers PG, Davila A, Andersen DT, et al.  
1088 Comparison of two bioinformatics tools used to characterize the microbial diversity  
1089 and predictive functional attributes of microbial mats from Lake Obersee, Antarctica.  
1090 *J Microbiol Methods* [Internet]. 2017;140:15–22. Available from:  
1091 <https://linkinghub.elsevier.com/retrieve/pii/S0167701217301781>

1092 84. Martiny AC, Treseder K, Pusch G. Phylogenetic conservatism of functional traits  
1093 in microorganisms. *ISME J* [Internet]. 2013;7:830–8. Available from:  
1094 <http://www.nature.com/articles/ismej2012160>



- 1095 85. George PBL, Creer S, Griffiths RI, Emmett BA, Robinson DA, Jones DL. Primer  
1096 and Database Choice Affect Fungal Functional but Not Biological Diversity Findings  
1097 in a National Soil Survey. *Front Environ Sci* [Internet]. 2019;7. Available from:  
1098 <https://www.frontiersin.org/article/10.3389/fenvs.2019.00173/full>
- 1099 86. Yang T, Adams JM, Shi Y, He JS, Jing X, Chen L, et al. Soil fungal diversity in  
1100 natural grasslands of the Tibetan Plateau: associations with plant diversity and  
1101 productivity. *New Phytol* [Internet]. 2017;215:756–65. Available from:  
1102 <https://onlinelibrary.wiley.com/doi/10.1111/nph.14606>
- 1103 87. Makiola A, Dickie IA, Holdaway RJ, Wood JR, Orwin KH, Glare TR. Land use is a  
1104 determinant of plant pathogen alpha- but not beta-diversity. *Mol Ecol* [Internet].  
1105 2019;28:3786–98. Available from:  
1106 <https://onlinelibrary.wiley.com/doi/abs/10.1111/mec.15177>
- 1107 88. Buscardo E, Souza RC, Meir P, Geml J, Schmidt SK, da Costa ACL, et al. Effects  
1108 of natural and experimental drought on soil fungi and biogeochemistry in an Amazon  
1109 rain forest. *Commun Earth Environ* [Internet]. 2021;2:55. Available from:  
1110 <http://www.nature.com/articles/s43247-021-00124-8>
- 1111 89. Liang M, Liu X, Parker IM, Johnson D, Zheng Y, Luo S, et al. Soil microbes drive  
1112 phylogenetic diversity-productivity relationships in a subtropical forest. *Sci Adv*  
1113 [Internet]. 2019;5:eaax5088. Available from:  
1114 <https://advances.sciencemag.org/lookup/doi/10.1126/sciadv.aax5088>
- 1115 90. Yang T, Tedersoo L, Soltis PS, Soltis DE, Gilbert JA, Sun M, et al. Phylogenetic  
1116 imprint of woody plants on the soil mycobiome in natural mountain forests of eastern  
1117 China. *ISME J* [Internet]. 2019;13:686–97. Available from:  
1118 <http://www.nature.com/articles/s41396-018-0303-x>
- 1119 91. Brinkmann N, Schneider D, Sahner J, Ballauff J, Edy N, Barus H, et al. Intensive

1120 tropical land use massively shifts soil fungal communities. *Sci Rep* [Internet].  
1121 2019;9:3403. Available from: <http://www.nature.com/articles/s41598-019-39829-4>  
1122 92. Egidi E, Delgado-Baquerizo M, Plett JM, Wang J, Eldridge DJ, Bardgett RD, et al.  
1123 A few Ascomycota taxa dominate soil fungal communities worldwide. *Nat Commun*  
1124 [Internet]. 2019;10:2369. Available from: <http://www.nature.com/articles/s41467-019->  
1125 10373-z

1126 93. Delgado-Baquerizo M, Guerra CA, Cano-Díaz C, Egidi E, Wang J-T, Eisenhauer  
1127 N, et al. The proportion of soil-borne pathogens increases with warming at the global  
1128 scale. *Nat Clim Chang* [Internet]. 2020;10:550–4. Available from:  
1129 <http://www.nature.com/articles/s41558-020-0759-3>

1130 94. Větrovský T, Kohout P, Kopecký M, Machac A, Man M, Bahnmann BD, et al. A  
1131 meta-analysis of global fungal distribution reveals climate-driven patterns. *Nat*  
1132 *Commun* [Internet]. 2019;10:5142. Available from:  
1133 <http://www.nature.com/articles/s41467-019-13164-8>

1134 95. Öpik M, Davison J, Moora M, Zobel M. DNA-based detection and identification of  
1135 Glomeromycota: the virtual taxonomy of environmental sequences. *Botany* [Internet].  
1136 2014;92:135–47. Available from: <http://www.nrcresearchpress.com/doi/10.1139/cjb->  
1137 2013-0110

1138 96. Berruti A, Desirò A, Visentin S, Zecca O, Bonfante P. ITS fungal barcoding  
1139 primers versus 18S AMF-specific primers reveal similar AMF-based diversity patterns  
1140 in roots and soils of three mountain vineyards. *Environ Microbiol Rep* [Internet].  
1141 2017;9:658–67. Available from: <http://doi.wiley.com/10.1111/1758-2229.12574>

1142 97. Anthony MA, Frey SD, Stinson KA. Fungal community homogenization, shift in  
1143 dominant trophic guild, and appearance of novel taxa with biotic invasion. *Ecosphere*  
1144 [Internet]. 2017;8:e01951. Available from: <http://doi.wiley.com/10.1002/ecs2.1951>

- 1145 98. Sansupa C, Wahdan SFM, Hossen S, Disayathanoowat T, Wubet T, Purahong  
1146 W. Can we use functional annotation of prokaryotic taxa (Faprotax) to assign the  
1147 ecological functions of soil bacteria? *Appl Sci* [Internet]. 2021;11:1–17. Available  
1148 from: <https://www.mdpi.com/2076-3417/11/2/688>
- 1149 99. Nilsson RH, Anslan S, Bahram M, Wurzbacher C, Baldrian P, Tedersoo L.  
1150 Mycobiome diversity: high-throughput sequencing and identification of fungi. *Nat Rev*  
1151 *Microbiol* [Internet]. 2019;17:95–109. Available from:  
1152 <http://www.nature.com/articles/s41579-018-0116-y>
- 1153 100. Comeau AM, Douglas GM, Langille MGI. Microbiome Helper: a Custom and  
1154 Streamlined Workflow for Microbiome Research. Eisen J, editor. *mSystems* [Internet].  
1155 2017;2. Available from: <https://msystems.asm.org/content/2/1/e00127-16>
- 1156 101. Piper AM, Batovska J, Cogan NOI, Weiss J, Cunningham JP, Rodoni BC, et al.  
1157 Prospects and challenges of implementing DNA metabarcoding for high-throughput  
1158 insect surveillance. *Gigascience* [Internet]. 2019;8:1–22. Available from:  
1159 <https://academic.oup.com/gigascience/article/doi/10.1093/gigascience/giz092/55416>  
1160 30
- 1161 102. Gogarten JP, Townsend JP. Horizontal gene transfer, genome innovation and  
1162 evolution. *Nat Rev Microbiol* [Internet]. 2005;3:679–87. Available from:  
1163 <http://www.nature.com/articles/nrmicro1204>
- 1164 103. Douglas GM, Langille MGI. Current and Promising Approaches to Identify  
1165 Horizontal Gene Transfer Events in Metagenomes. Dagan T, editor. *Genome Biol*  
1166 *Evol* [Internet]. 2019;11:2750–66. Available from:  
1167 <https://academic.oup.com/gbe/article/11/10/2750/5554466>
- 1168 104. Seiler E, Trappe K, Renard BY. Where did you come from, where did you go:  
1169 Refining metagenomic analysis tools for horizontal gene transfer characterisation.

1170 Dessimoz C, editor. PLoS Comput Biol [Internet]. 2019;15:e1007208. Available from:  
1171 <https://dx.plos.org/10.1371/journal.pcbi.1007208>

1172 105. van Dijk B, Hogeweg P, Doekes HM, Takeuchi N. Slightly beneficial genes are  
1173 retained by bacteria evolving DNA uptake despite selfish elements. Elife [Internet].  
1174 2020;9:1–36. Available from: <https://elifesciences.org/articles/56801>

1175 106. Treseder KK, Lennon JT. Fungal Traits That Drive Ecosystem Dynamics on  
1176 Land. Microbiol Mol Biol Rev [Internet]. 2015;79:243–62. Available from:  
1177 <http://mmbbr.asm.org/lookup/doi/10.1128/MMBR.00001-15>

1178 107. Smalla K, Jechalke S, Top EM. Plasmid Detection, Characterization, and  
1179 Ecology. Microbiol Spectr [Internet]. 2015;3. Available from:  
1180 <http://www.asmscience.org/content/journal/microbiolspec/10.1128/microbiolspec.PLA>  
1181 S-0038-2014

1182 108. Dunivin TK, Choi J, Howe A, Shade A. RefSoil+: a Reference Database for  
1183 Genes and Traits of Soil Plasmids. Sharpton TJ, editor. mSystems [Internet]. 2019;4.  
1184 Available from: <https://msystems.asm.org/content/4/1/e00349-18>

1185 109. Aminov RI. Horizontal Gene Exchange in Environmental Microbiota. Front  
1186 Microbiol [Internet]. 2011;2. Available from:  
1187 <http://journal.frontiersin.org/article/10.3389/fmicb.2011.00158/abstract>

1188 110. Brito IL. Examining horizontal gene transfer in microbial communities. Nat Rev  
1189 Microbiol [Internet]. 2021;19:442–53. Available from:  
1190 <http://www.nature.com/articles/s41579-021-00534-7>

1191 111. Banos S, Lentendu G, Kopf A, Wubet T, Glöckner FO, Reich M. A  
1192 comprehensive fungi-specific 18S rRNA gene sequence primer toolkit suited for  
1193 diverse research issues and sequencing platforms. BMC Microbiol [Internet].  
1194 2018;18:190. Available from:

1195 <https://bmcmicrobiol.biomedcentral.com/articles/10.1186/s12866-018-1331-4>

1196 112. Bukin YS, Galachyants YP, Morozov I V., Bukin S V., Zakharenko AS,  
1197 Zemskaya TI. The effect of 16S rRNA region choice on bacterial community  
1198 metabarcoding results. *Sci Data* [Internet]. 2019;6:190007. Available from:  
1199 <http://www.nature.com/articles/sdata20197>

1200 113. Xu Z, Malmer D, Langille MGI, Way SF, Knight R. Which is more important for  
1201 classifying microbial communities: who's there or what they can do? *ISME J*  
1202 [Internet]. International Society for Microbial Ecology; 2014 [cited 2015 Aug  
1203 31];8:2357–9. Available from: <http://dx.doi.org/10.1038/ismej.2014.157>

1204 114. Karst SM, Dueholm MS, McIlroy SJ, Kirkegaard RH, Nielsen PH, Albertsen M.  
1205 Retrieval of a million high-quality, full-length microbial 16S and 18S rRNA gene  
1206 sequences without primer bias. *Nat Biotechnol* [Internet]. Nature Publishing Group;  
1207 2018;36:190–5. Available from: <http://dx.doi.org/10.1038/nbt.4045>

1208 115. Tedersoo L, Anslan S. Towards PacBio-based pan-eukaryote metabarcoding  
1209 using full-length ITS sequences. *Environ Microbiol Rep* [Internet]. 2019;11:659–68.  
1210 Available from: <https://onlinelibrary.wiley.com/doi/abs/10.1111/1758-2229.12776>

1211 116. Johnson JS, Spakowicz DJ, Hong B-Y, Petersen LM, Demkowicz P, Chen L, et  
1212 al. Evaluation of 16S rRNA gene sequencing for species and strain-level microbiome  
1213 analysis. *Nat Commun* [Internet]. 2019;10:5029. Available from:  
1214 <http://www.nature.com/articles/s41467-019-13036-1>

1215 117. Philippot L, Andersson SGE, Battin TJ, Prosser JI, Schimel JP, Whitman WB, et  
1216 al. The ecological coherence of high bacterial taxonomic ranks. *Nat Rev Microbiol*  
1217 [Internet]. 2010;8:523–9. Available from: <http://www.nature.com/articles/nrmicro2367>

1218 118. Fierer N, Bradford MA, Jackson RB. TOWARD AN ECOLOGICAL  
1219 CLASSIFICATION OF SOIL BACTERIA. *Ecology* [Internet]. 2007;88:1354–64.

1220 Available from: <http://doi.wiley.com/10.1890/05-1839>

1221 119. Callahan BJ, Wong J, Heiner C, Oh S, Theriot CM, Gulati AS, et al. High-  
1222 throughput amplicon sequencing of the full-length 16S rRNA gene with single-  
1223 nucleotide resolution. *Nucleic Acids Res* [Internet]. 2019;47:e103–e103. Available  
1224 from: <https://academic.oup.com/nar/article/47/18/e103/5527971>

1225 120. Feldbauer R, Schulz F, Horn M, Rattei T. Prediction of microbial phenotypes  
1226 based on comparative genomics. *BMC Bioinformatics* [Internet]. 2015;16:S1.  
1227 Available from: [http://bmcbioinformatics.biomedcentral.com/articles/10.1186/1471-](http://bmcbioinformatics.biomedcentral.com/articles/10.1186/1471-2105-16-S14-S1)  
1228 [2105-16-S14-S1](http://bmcbioinformatics.biomedcentral.com/articles/10.1186/1471-2105-16-S14-S1)

1229 121. Weimann A, Mooren K, Frank J, Pope PB, Bremges A, McHardy AC. From  
1230 Genomes to Phenotypes: TraitAr, the Microbial Trait Analyzer. Segata N, editor.  
1231 *mSystems* [Internet]. 2016;1:043315. Available from:  
1232 <https://msystems.asm.org/content/1/6/e00101-16>

1233 122. Goberna M, Verdú M. Predicting microbial traits with phylogenies. *ISME J*  
1234 [Internet]. 2016;10:959–67. Available from:  
1235 <http://www.nature.com/articles/ismej2015171>

1236 123. Levatić J, Brbić M, Perdih TS, Kocev D, Vidulin V, Šmuc T, et al. Phenotype  
1237 Prediction with Semi-supervised Classification Trees. *Lect Notes Comput Sci*  
1238 (including Subser Lect Notes Artif Intell Lect Notes Bioinformatics) [Internet]. 2018. p.  
1239 138–50. Available from: [http://link.springer.com/10.1007/978-3-319-78680-3\\_10](http://link.springer.com/10.1007/978-3-319-78680-3_10)

1240 124. Zanne AE, Powell JR, Flores-Moreno H, Kiers ET, van 't Padjé A, Cornwell WK.  
1241 Finding fungal ecological strategies: Is recycling an option? *Fungal Ecol* [Internet].  
1242 2020;46:100902. Available from:  
1243 <https://linkinghub.elsevier.com/retrieve/pii/S1754504819302181>

1244 125. Kembel SW, Cowan PD, Helmus MR, Cornwell WK, Morlon H, Ackerly DD, et

1245 al. Picante: R tools for integrating phylogenies and ecology. *Bioinformatics* [Internet].  
1246 2010;26:1463–4. Available from:  
1247 <http://www.ncbi.nlm.nih.gov/sites/entrez?Db=pubmed&DbFrom=pubmed&Cmd=Link>  
1248  [&LinkName=pubmed\\_pubmed&LinkReadableName=Related](http://www.ncbi.nlm.nih.gov/sites/entrez?Db=pubmed&DbFrom=pubmed&Cmd=Link&LinkName=pubmed_pubmed&LinkReadableName=Related)  
1249  [Articles&IdsFromResult=20395285&ordinalpos=3&itool=EntrezSystem2.PEntrez.Pub](http://www.ncbi.nlm.nih.gov/sites/entrez?Db=pubmed&DbFrom=pubmed&Cmd=Link&LinkName=pubmed_pubmed&LinkReadableName=Related&IdsFromResult=20395285&ordinalpos=3&itool=EntrezSystem2.PEntrez.Pub)  
1250  [med.Pubmed\\_ResultsPanel.Pubmed\\_RVDocSum](http://www.ncbi.nlm.nih.gov/sites/entrez?Db=pubmed&DbFrom=pubmed&Cmd=Link&LinkName=pubmed_pubmed&LinkReadableName=Related&IdsFromResult=20395285&ordinalpos=3&itool=EntrezSystem2.PEntrez.Pubmed.Pubmed_ResultsPanel.Pubmed_RVDocSum) [http://www.ncbi.n](http://www.ncbi.nlm.nih.gov/sites/entrez?Db=pubmed&DbFrom=pubmed&Cmd=Link&LinkName=pubmed_pubmed&LinkReadableName=Related&IdsFromResult=20395285&ordinalpos=3&itool=EntrezSystem2.PEntrez.Pubmed.Pubmed_ResultsPanel.Pubmed_RVDocSum)  
1251 126. Louca S, Doebeli M. Efficient comparative phylogenetics on large trees.  
1252 Valencia A, editor. *Bioinformatics* [Internet]. 2018;34:1053–5. Available from:  
1253 <https://academic.oup.com/bioinformatics/article/34/6/1053/4582279>  
1254 127. Walters KE, Martiny JHB. Alpha-, beta-, and gamma-diversity of bacteria varies  
1255 across habitats. Nabout JC, editor. *PLoS One* [Internet]. 2020;15:e0233872.  
1256 Available from: <https://dx.plos.org/10.1371/journal.pone.0233872>  
1257 128. Martiny AC. High proportions of bacteria are culturable across major biomes.  
1258 *ISME J* [Internet]. Springer US; 2019;3–6. Available from:  
1259 <http://dx.doi.org/10.1038/s41396-019-0410-3>  
1260 129. Wemheuer F, Taylor JA, Daniel R, Johnston E, Meinicke P, Thomas T, et al.  
1261 *Tax4Fun2: prediction of habitat-specific functional profiles and functional redundancy*  
1262 *based on 16S rRNA gene sequences. Environ Microbiome* [Internet]. 2020;15:11.  
1263 Available from:  
1264 [https://environmentalmicrobiome.biomedcentral.com/articles/10.1186/s40793-020-](https://environmentalmicrobiome.biomedcentral.com/articles/10.1186/s40793-020-00358-7)  
1265 [00358-7](https://environmentalmicrobiome.biomedcentral.com/articles/10.1186/s40793-020-00358-7)  
1266 130. Cheifet B. Where is genomics going next? *Genome Biol* [Internet]. 2019;20:17.  
1267 Available from: [https://genomebiology.biomedcentral.com/articles/10.1186/s13059-](https://genomebiology.biomedcentral.com/articles/10.1186/s13059-019-1626-2)  
1268 [019-1626-2](https://genomebiology.biomedcentral.com/articles/10.1186/s13059-019-1626-2)  
1269 131. Piro VC, Dadi TH, Seiler E, Reinert K, Renard BY. *ganon: precise*

1270 metagenomics classification against large and up-to-date sets of reference  
1271 sequences. *Bioinformatics* [Internet]. 2020;36:i12–20. Available from:  
1272 [https://academic.oup.com/bioinformatics/article/36/Supplement\\_1/i12/5870470](https://academic.oup.com/bioinformatics/article/36/Supplement_1/i12/5870470)  
1273 132. Choi J, Yang F, Stepanauskas R, Cardenas E, Garoutte A, Williams R, et al.  
1274 Strategies to improve reference databases for soil microbiomes. *ISME J* [Internet].  
1275 2017;11:829–34. Available from: <http://www.nature.com/articles/ismej2016168>  
1276 133. Louca S, Jacques SMS, Pires APF, Leal JS, Srivastava DS, Parfrey LW, et al.  
1277 High taxonomic variability despite stable functional structure across microbial  
1278 communities. *Nat Ecol Evol* [Internet]. 2017;1:0015. Available from:  
1279 <http://www.nature.com/articles/s41559-016-0015>  
1280 134. Nagpal S, Haque MM, Singh R, Mande SS. iVikodak—A Platform and Standard  
1281 Workflow for Inferring, Analyzing, Comparing, and Visualizing the Functional  
1282 Potential of Microbial Communities. *Front Microbiol* [Internet]. 2019;9. Available from:  
1283 <https://www.frontiersin.org/article/10.3389/fmicb.2018.03336/full>  
1284 135. Grigoriev I V., Nikitin R, Haridas S, Kuo A, Ohm R, Otiillar R, et al. MycoCosm  
1285 portal: Gearing up for 1000 fungal genomes. *Nucleic Acids Res.* 2014;42:699–704.  
1286 136. Bonkowski M, Dumack K, Fiore-Donno AM. The Protists in Soil—A Token of  
1287 Untold Eukaryotic Diversity. *Mod Soil Microbiol* [Internet]. Third edition. | Boca Raton :  
1288 Taylor & Francis, 2019.: CRC Press; 2019. p. 125–40. Available from:  
1289 <https://www.taylorfrancis.com/books/9780429607929/chapters/10.1201/9780429059>  
1290 186-8  
1291 137. Xiong W, Jousset A, Guo S, Karlsson I, Zhao Q, Wu H, et al. Soil protist  
1292 communities form a dynamic hub in the soil microbiome. *ISME J* [Internet].  
1293 2018;12:634–8. Available from: <http://www.nature.com/articles/ismej2017171>  
1294 138. Fiore-Donno AM, Richter-Heitmann T, Degrune F, Dumack K, Regan KM,



1295 Marhan S, et al. Functional Traits and Spatio-Temporal Structure of a Major Group of  
1296 Soil Protists (Rhizaria: Cercozoa) in a Temperate Grassland. *Front Microbiol*  
1297 [Internet]. 2019;10. Available from:  
1298 <https://www.frontiersin.org/article/10.3389/fmicb.2019.01332/full>

1299 139. Delgado-Baquerizo M, Trivedi P, Trivedi C, Eldridge DJ, Reich PB, Jeffries TC,  
1300 et al. Microbial richness and composition independently drive soil multifunctionality.  
1301 Bennett A, editor. *Funct Ecol* [Internet]. 2017;31:2330–43. Available from:  
1302 <https://onlinelibrary.wiley.com/doi/abs/10.1111/1365-2435.12924>

1303 140. Terrat S, Horrigue W, Dequietd S, Saby NPA, Lelièvre M, Nowak V, et al.  
1304 Mapping and predictive variations of soil bacterial richness across France. *PLoS*  
1305 *One*. 2017;12:5–8.

1306 141. Schloter M, Nannipieri P, Sørensen SJ, van Elsas JD. Microbial indicators for  
1307 soil quality. *Biol Fertil Soils. Biology and Fertility of Soils*; 2018;54:1–10.

1308 142. Hariharan J, Sengupta A, Grewal P, Dick WA. Functional Predictions of  
1309 Microbial Communities in Soil as Affected by Long-term Tillage Practices. *Agric*  
1310 *Environ Lett* [Internet]. 2017;2:170031. Available from:  
1311 <https://onlinelibrary.wiley.com/doi/10.2134/ael2017.09.0031>

1312 143. Manor O, Borenstein E. Systematic Characterization and Analysis of the  
1313 Taxonomic Drivers of Functional Shifts in the Human Microbiome. *Cell Host Microbe*  
1314 [Internet]. 2017;21:254–67. Available from:  
1315 <https://linkinghub.elsevier.com/retrieve/pii/S1931312816305261>

1316 144. Zhang Q, Zhao H, Wu D, Cao D, Ma W. A comprehensive analysis of the  
1317 microbiota composition and gene expression in colorectal cancer. *BMC Microbiol*  
1318 [Internet]. 2020;20:308. Available from:  
1319 <https://bmcmicrobiol.biomedcentral.com/articles/10.1186/s12866-020-01938-w>

1320 145. Zhang L, Liu Y, Zheng HJ, Zhang CP. The Oral Microbiota May Have Influence  
1321 on Oral Cancer. *Front Cell Infect Microbiol* [Internet]. 2020;9. Available from:  
1322 <https://www.frontiersin.org/article/10.3389/fcimb.2019.00476/full>

1323 146. Ji P, Rhoads WJ, Edwards MA, Pruden A. Impact of water heater temperature  
1324 setting and water use frequency on the building plumbing microbiome. *ISME J*  
1325 [Internet]. 2017;11:1318–30. Available from:  
1326 <http://www.nature.com/articles/ismej201714>

1327 147. Maguvu TE, Bezuidenhout CC, Kritzinger R, Tsholo K, Plaatjie M, Molale-Tom  
1328 LG, et al. Combining physicochemical properties and microbiome data to evaluate  
1329 the water quality of South African drinking water production plants. Aziz RK, editor.  
1330 *PLoS One* [Internet]. 2020;15:e0237335. Available from:  
1331 <https://dx.plos.org/10.1371/journal.pone.0237335>

1332 148. Ramirez KS, Döring M, Eisenhauer N, Gardi C, Ladau J, Leff JW, et al. Toward  
1333 a global platform for linking soil biodiversity data. *Front Ecol Evol* [Internet]. 2015;3.  
1334 Available from: <http://journal.frontiersin.org/Article/10.3389/fevo.2015.00091/abstract>

1335 149. Raguideau S, Plancade S, Pons N, Leclerc M, Laroche B. Inferring Aggregated  
1336 Functional Traits from Metagenomic Data Using Constrained Non-negative Matrix  
1337 Factorization: Application to Fiber Degradation in the Human Gut Microbiota.  
1338 Maranas CD, editor. *PLOS Comput Biol* [Internet]. 2016;12:e1005252. Available  
1339 from: <https://dx.plos.org/10.1371/journal.pcbi.1005252>

1340 150. Fierer N, Barberán A, Laughlin DC. Seeing the forest for the genes: Using  
1341 metagenomics to infer the aggregated traits of microbial communities. *Front Microbiol*  
1342 [Internet]. 2014;5. Available from:  
1343 <http://journal.frontiersin.org/article/10.3389/fmicb.2014.00614/abstract>

1344 151. Weisskopf L, Schulz S, Garbeva P. Microbial volatile organic compounds in

1345 intra-kingdom and inter-kingdom interactions. Nat Rev Microbiol [Internet].  
 1346 2021;19:391–404. Available from: [http://www.nature.com/articles/s41579-020-00508-](http://www.nature.com/articles/s41579-020-00508-1)  
 1347 [1](http://www.nature.com/articles/s41579-020-00508-1)  
 1348 152. Allison SD, Martiny JBH. Resistance, resilience, and redundancy in microbial  
 1349 communities. Proc Natl Acad Sci [Internet]. 2008;105:11512–9. Available from:  
 1350 <http://www.pnas.org/cgi/doi/10.1073/pnas.0801925105>  
 1351 153. Navarro LM, Fernández N, Guerra C, Guralnick R, Kissling WD, Londoño MC,  
 1352 et al. Monitoring biodiversity change through effective global coordination. Curr Opin  
 1353 Environ Sustain [Internet]. 2017;29:158–69. Available from:  
 1354 <https://linkinghub.elsevier.com/retrieve/pii/S1877343517301665>

1355

1356 **Tables**

1357 Table 1: **Numbers of organisms, genes, enzymes and metabolic pathways**  
 1358 **available in the CAZy, KEGG and MetaCyc databases.** When possible, we detailed  
 1359 the number of organisms for the three domains of the tree of life. CAZy includes  
 1360 glycoside hydrolases (GH), glycosyl transferases (GT), carbohydrate esterases (CE),  
 1361 polysaccharide lyases (PL), and auxiliary activities (AA).

1362

| Databases                                      | Organisms                                          | Metabolic Pathways | Enzymes/Genes                                 |
|------------------------------------------------|----------------------------------------------------|--------------------|-----------------------------------------------|
| CAZy (Carbohydrate-Active Enzymes)             | Eukaryotes (344), Bacteria (20,421), Archaea (413) | NA                 | GH (171), GT (114), PL (41), CE (19), AA (16) |
| KEGG (Kyoto Encyclopedia of Genes and Genomes) | Eukaryotes (557), Bacteria (6,317), Archaea (344)  | 547                | KEGG Orthology (KO) groups 24,402             |
| MetaCyc (metabolic pathways and enzymes)       | Total (3,295)                                      | 2,937              | 13,356                                        |

1363

1364 Table 2: List of the functional inference tools, ecological trait assignment tools and databases.

1365

| Tools    | Implementation         | Targeted genes    | Functional Prediction                                   | Approaches           | Methods                                                                  | Inputs used                                    | Strengths and Specificities                                                                                                                                                                                                                                       | Limitations                                                                                                                                              |
|----------|------------------------|-------------------|---------------------------------------------------------|----------------------|--------------------------------------------------------------------------|------------------------------------------------|-------------------------------------------------------------------------------------------------------------------------------------------------------------------------------------------------------------------------------------------------------------------|----------------------------------------------------------------------------------------------------------------------------------------------------------|
| PanFP    | Perl (recently Python) | 16S rRNA          | KEGG Orthology; Gene Ontology; Pfam; TIGRFAM            | Functional inference | builds a pangenome                                                       | NCBI taxonomy                                  | - uses functional profile of the pangenome so could be less sensitive to horizontal gene transfer                                                                                                                                                                 | - evolutionary models are not taken into account<br>- no confidence score generated<br>- not yet available for microbial eukaryotes                      |
| PAPRICA  | Python                 | 16S/18S rRNA      | MetaCyc ontology                                        | Functional inference | phylogenetic placement                                                   | based on rDNA amplicon sequences               | - 18S rRNA amplicons are taken into account<br>- examples on the developer's blog                                                                                                                                                                                 | - errors may occur with sequence placement due to poor resolution of rRNA amplicons in some clades                                                       |
| PICRUSt  | Python                 | 16S rRNA          | KEGG Orthology; KEGG Pathway; COG; CAZy*                | Functional inference | ASR (Wagner Parsimony, ACE ML, ACE REML, ACE PIC)                        | Greengenes taxonomy (18may2012 or v13.5/v13.8) | - evolutionary models are taken into account<br>- confidence score generated (NSTI)<br>- correction of OTU copy numbers                                                                                                                                           | - based on specific taxonomy (GreenGenes identifiers)<br>- KEGG database not updated since 2011<br>- no pre-calculated table of fungal genomes available |
| PICRUSt2 | Python / R             | 16S/18S rRNA/ ITS | MetaCyc; KEGG Orthology; EC number, COGS, Pfam, TIGRFAM | Functional inference | HSP (maximum parsimony, empirical probabilities, subtree averaging, SCP) | based on rDNA amplicon sequences               | - evolutionary models are taken into account<br>- confidence score generated (NSTI)<br>- twice as many KO scores<br>- multiple HSP methods can be implemented (takes branch length weighting into account)<br>- 18S rRNA and ITS amplicons are taken into account | - errors may occur with sequence placement due to poor resolution of rRNA amplicons in some clades                                                       |

|           |           |          |                                                                                             |                      |                                                                                            |                                  |                                                                                                                                                                                                                                                                                                       |                                                                                                                                |
|-----------|-----------|----------|---------------------------------------------------------------------------------------------|----------------------|--------------------------------------------------------------------------------------------|----------------------------------|-------------------------------------------------------------------------------------------------------------------------------------------------------------------------------------------------------------------------------------------------------------------------------------------------------|--------------------------------------------------------------------------------------------------------------------------------|
|           |           |          |                                                                                             |                      |                                                                                            |                                  | - extensive documentation and active community                                                                                                                                                                                                                                                        |                                                                                                                                |
| Piphillin | Web-based | 16S rRNA | BioCyc; KEGG                                                                                | Functional inference | Nearest-neighbor matching of 16S rRNA gene amplicons with genomes from reference databases | based on rDNA amplicon sequences | - regular updates of functional databases<br>- rRNA copy number adjustment                                                                                                                                                                                                                            | - available online only<br>- available for 16S rRNA only                                                                       |
| SINAPS    | USEARCH   | 16S rRNA | Trait annotation (e.g., energy metabolism, Gram-positive staining, presence of a flagellum) | Functional inference | word counting                                                                              | Greengenes; SILVA                | - confidence is estimated by bootstrapping<br>- integrated to USEARCH tool                                                                                                                                                                                                                            | - no peer-reviewed publication (biorxiv preprint)<br>- detailed explanation is missing (e.g., how was protrait input created?) |
| Tax4Fun   | R package | 16S rRNA | KEGG Orthology                                                                              | Functional inference | nearest-neighbour search based on a minimum 16S rRNA sequence similarity                   | SILVA taxonomy                   | - uses R (multiplatform) with pre-calculated files<br>- confidence score generated (FTU and FSU)<br>- the algorithm could better predict poorly characterized taxa compared to approaches based on ASR with possible large distances in the tree, thanks to a minimum of similarity between sequences | - based on specific taxonomy (SILVA identifiers)<br>- KEGG database not updated since 2011                                     |

|          |                                  |          |                          |                      |                                    |                                  |                                                                                                                                                                                                                                                                                                                                                                                                                        |                                                                                                                                                                                      |
|----------|----------------------------------|----------|--------------------------|----------------------|------------------------------------|----------------------------------|------------------------------------------------------------------------------------------------------------------------------------------------------------------------------------------------------------------------------------------------------------------------------------------------------------------------------------------------------------------------------------------------------------------------|--------------------------------------------------------------------------------------------------------------------------------------------------------------------------------------|
| Tax4Fun2 | R package                        | 16S rRNA | KEGG Orthology           | Functional inference | BLAST                              | based on rDNA amplicon sequences | <ul style="list-style-type: none"> <li>- algorithm with a minimal sequence similarity</li> <li>- uses R (multiplatform) with pre-calculated, highly memory-efficient platform-independent files</li> <li>- confidence score generated (FTU and FSU)</li> <li>- KO update from 2018</li> <li>- calculates the redundancy of specific functions directly</li> <li>- builds its own habitat-specific reference</li> </ul> | - not yet available for microbial eukaryotes                                                                                                                                         |
| Vikodak  | Web-based (not longer available) | 16S rRNA | KEGG pathway, EC number  | Functional inference | microbial co-existence patterns    | RDP, SILVA                       | <ul style="list-style-type: none"> <li>- pathway exclusion cut-off value is available to provide the minimum percentage of genes/enzymes belonging to a metabolic pathway required to consider the pathway as functional.</li> <li>- compares two datasets</li> </ul>                                                                                                                                                  | - not longer available<br>- not yet available for microbial eukaryotes                                                                                                               |
| iVikodak | Web-based                        | 16S rRNA | KEGG; Pfam; COG; TIGRfam | Functional inference | microbial co-inhabitation patterns | RDP, GreenGenes, SILVA           | <ul style="list-style-type: none"> <li>- user-friendly for non-expert bioinformaticians</li> <li>- integrated tools for statistical comparisons</li> <li>- graphical visualizations</li> </ul>                                                                                                                                                                                                                         | - available online only<br>- not yet available for microbial eukaryotes                                                                                                              |
| FUNGuild | Python / Web-based               | ITS      | Guild type               | Trait assignment     | not applicable                     | based on UNITE taxonomy (ITS)    | - trait quality for taxon assignment                                                                                                                                                                                                                                                                                                                                                                                   | - no regular update<br>- 18S rRNA taxonomy with related database not included. However, the database is open-access, and a homemade wrapper can be used for 18S metabarcoding output |

|           |                                      |          |                                                                                                                                 |                            |                                                                                                                                                                    |                  |                                                                                                                                                                |                                                                                                                                                                            |
|-----------|--------------------------------------|----------|---------------------------------------------------------------------------------------------------------------------------------|----------------------------|--------------------------------------------------------------------------------------------------------------------------------------------------------------------|------------------|----------------------------------------------------------------------------------------------------------------------------------------------------------------|----------------------------------------------------------------------------------------------------------------------------------------------------------------------------|
| FAPRO-TAX | Python; flat file                    | 16S rRNA | Ecological functions (e.g., nitrification, denitrification or fermentation)                                                     | Trait assignment; Database | If all type strains of a species at the genus level share the function, FAPROTAX assumes that all uncultured organisms of this genus possess the putative function | SILVA (128, 132) | - based on the literature of cultured taxa<br>- availability of all literature to create the database<br>- functions easily added to the tool                  | - implicit assumption (see algorithm column) could be false with the increase of newly cultured organisms<br>- does not infer upper rank when taxonomic resolution is poor |
| BacDive   | Python and R API, R package          | /        | Morphology, physiology (API®-tests), molecular data, and cultivation conditions                                                 | Database                   | not applicable                                                                                                                                                     | NCBI taxonomy    | - provides links to ENA, GenBank, SILVA, BRENDA, GBIF, ChEBI, Straininfo website data<br>- a match with 16S rRNA sequences is available from SILVA             | - does not provide a tool for metabarcoding output                                                                                                                         |
| BugBase   | R / Python                           | 16S rRNA | KEGG                                                                                                                            | Functional inference       | PICRUSt; custom trait assignment                                                                                                                                   | Greengenes       | - biologically interpretable traits (Gram staining, oxygen tolerance, biofilm formation, pathogenicity, mobile element content and oxidative stress tolerance) | - no peer-reviewed publication (biorxiv preprint)                                                                                                                          |
| IJSEM     | flat file with R script for curation | /        | IJSEM                                                                                                                           | Database                   | not applicable                                                                                                                                                     | not applicable   | - 16S rRNA accession numbers available                                                                                                                         | - does not provide a tool for metabarcoding output                                                                                                                         |
| ProTraits | Web-based; flat files                | /        | Wikipedia; MicrobeWiki; HAMAP proteomes; PubMed abstracts and publications; Bacmap; Genoscope; JGI, KEGG, NCBI; Karyn's Genomes | Database                   | not applicable                                                                                                                                                     | not applicable   | - phenotypic inference<br>- large resource (~545,000 phenotypes scanning 424 traits across 3,046 species)<br>- NCBI taxonomy available                         | - does not provide a tool for metabarcoding output                                                                                                                         |

|                         |                             |          |                                                                               |                                        |                                                                                                        |                               |                                                                                                                                                                                     |                                                    |
|-------------------------|-----------------------------|----------|-------------------------------------------------------------------------------|----------------------------------------|--------------------------------------------------------------------------------------------------------|-------------------------------|-------------------------------------------------------------------------------------------------------------------------------------------------------------------------------------|----------------------------------------------------|
| BURRITO                 | Web-based                   | 16S rRNA | KEGG Orthology                                                                | Functional inference                   | PICRUSt                                                                                                | Greengenes                    | - explores simultaneous and integrative studies of taxonomic and functional profiles                                                                                                | - based on PICRUSt v1                              |
| MACADAM                 | Python / web implementation | 16S rRNA | MetaCyc, MicroCyc, FAPROTAX; IJSEM                                            | Functional inference; Trait assignment | custom methods (provides functional information about upper-rank taxa when organism name is not found) | NCBI taxonomy                 | - pathway score and pathway frequency score are provided, allowing knowledge of number of enzymes present in the pathway                                                            | - not yet available for microbial eukaryotes       |
| FunFun                  | R package; flat file        | /        | Ecological traits                                                             | Trait assignment                       | not applicable                                                                                         | based on UNITE taxonomy (ITS) | - uses R (multiplatform)<br>- complementary to FUNGuild                                                                                                                             |                                                    |
| Fungal-Traits           | flat files                  | /        | Guild type, body type, habitat                                                | Trait assignment                       | not applicable                                                                                         | based on UNITE taxonomy (ITS) | - expert work to propose traits at the genus level<br>- merges the FUNGuild and FunFun tools<br>- an excel file with vlookup function is available to assign guilds or trait data   | - does not provide a tool for metabarcoding output |
| DEEMY                   | Web-based                   | /        | Morphology, anatomy, potential for chemical reactions, or even ecology traits | Database                               | not applicable                                                                                         | not applicable                | - link to tree species associated<br>- includes images                                                                                                                              | - specialized in ectomycorrhizas only              |
| Bacteria-archaea-traits | R package; flat file        | 16S rRNA | Traits, phenotypic traits, quantitative genomic traits                        | Database                               | not applicable                                                                                         | NCBI taxonomy, GTDB taxonomy  | - groups the major bacterial and archaeal databases into one database<br>- traits and species data condensed<br>- R workflow available to retrieve condensed trait and species data |                                                    |



|                  |           |   |                              |                     |                                                       |                                                  |                                                                                                                                             |                                   |
|------------------|-----------|---|------------------------------|---------------------|-------------------------------------------------------|--------------------------------------------------|---------------------------------------------------------------------------------------------------------------------------------------------|-----------------------------------|
| OntoBio-<br>tope | Web-based | / | Habitats and pheno-<br>types | Database            | ToMap (Text to on-<br>tology mapping)                 | NCBI<br>taxonomy                                 | - term relevance is eval-<br>uated by the semantic<br>search engine PubMed-<br>Biotope<br>- maintained by around<br>30 microbiology experts | - dedicated to the food<br>domain |
| @Minter          | Python    | / | Microbial interac-<br>tions  | Machine<br>learning | Support-vector ma-<br>chine (SVM)-based<br>classifier | No specific tax-<br>onomy, just<br>species level | - original approach to get<br>information on microbial<br>interactions rapidly                                                              | - species name required           |

1366





Table 1

| <b>Databases</b>                               | <b>Organisms</b>                                   |
|------------------------------------------------|----------------------------------------------------|
| CAZy (Carbohydrate-Active Enzymes)             | Eukaryotes (344), Bacteria (20,421), Archaea (413) |
| KEGG (Kyoto Encyclopedia of Genes and Genomes) | Eukaryotes (557), Bacteria (6,317), Archaea (344)  |
| MetaCyc (metabolic pathways and enzymes)       | Total (3,295)                                      |

Table 1

| <b>Metabolic Pathways</b> | <b>Enzymes/Genes</b>                          |
|---------------------------|-----------------------------------------------|
| NA                        | GH (171), GT (114), PL (41), CE (19), AA (16) |
| 547                       | KEGG Orthology (KO) groups 24,402             |
| 2.937                     | 13.356                                        |

Table 2

| <b>Tools</b>          | <b>Implementation</b>            | <b>Targeted genes</b> |
|-----------------------|----------------------------------|-----------------------|
| PanFP                 | Perl (recently Python)           | 16S rRNA              |
| PAPRICA               | Python                           | 16S/18S rRNA          |
| PICRUS <sub>t</sub>   | Python                           | 16S rRNA              |
| PICRUS <sub>t</sub> 2 | Python / R                       | 16S/18S rRNA/ ITS     |
| Piphillin             | Web-based                        | 16S rRNA              |
| SINAPS                | USEARCH                          | 16S rRNA              |
| Tax4Fun               | R package                        | 16S rRNA              |
| Tax4Fun2              | R package                        | 16S rRNA              |
| Vikodak               | Web-based (not longer available) | 16S rRNA              |
| iVikodak              | Web-based                        | 16S rRNA              |
| FUNGuild              | Python / Web-based               | ITS                   |
| FAPROTAX              | Python; flat file                | 16S rRNA              |

Table 2

|                         |                                      |          |
|-------------------------|--------------------------------------|----------|
| BacDive                 | Python and R API, R package          | /        |
| BugBase                 | R / Python                           | 16S rRNA |
| IJSEM                   | flat file with R script for curation | /        |
| ProTraits               | Web-based; flat files                | /        |
| BURRITO                 | Web-based                            | 16S rRNA |
| MACADAM                 | Python / web implementation          | 16S rRNA |
| Fun <sup>Fun</sup>      | R package; flat file                 | /        |
| FungalTraits            | flat files                           | /        |
| DEEMY                   | Web-based                            | /        |
| Bacteria-archaea-traits | R package; flat file                 | 16S rRNA |
| OntoBiotope             | Web-based                            | /        |
| @Minter                 | Python                               | /        |

Table 2

| <b>Functional Prediction</b>                                                                         | <b>Approaches</b>          |
|------------------------------------------------------------------------------------------------------|----------------------------|
| KEGG Orthology; Gene Ontology; Pfam; TIGRFAM                                                         | Functional inference       |
| MetaCyc ontology                                                                                     | Functional inference       |
| KEGG Orthology; KEGG Pathway; COG; CAZy*                                                             | Functional inference       |
| MetaCyc; KEGG Orthology; EC number, COGS, Pfam, TIGRFAM                                              | Functional inference       |
| BioCyc; KEGG                                                                                         | Functional inference       |
| Trait annotation ( <i>e.g.</i> , energy metabolism, Gram-positive staining, presence of a flagellum) | Functional inference       |
| KEGG Orthology                                                                                       | Functional inference       |
| KEGG Orthology                                                                                       | Functional inference       |
| KEGG pathway, EC number                                                                              | Functional inference       |
| KEGG; Pfam; COG; TIGRfam                                                                             | Functional inference       |
| Guild type                                                                                           | Trait assignment           |
| Ecological functions ( <i>e.g.</i> , nitrification, denitrification or fermentation)                 | Trait assignment; Database |



Table 2

|                                                                                                                                 |                                           |
|---------------------------------------------------------------------------------------------------------------------------------|-------------------------------------------|
| Morphology, physiology (API®-tests), molecular data, and cultivation conditions                                                 | Database                                  |
| KEGG                                                                                                                            | Functional inference                      |
| IJSEM                                                                                                                           | Database                                  |
| Wikipedia; MicrobeWiki; HAMAP proteomes; PubMed abstracts and publications; Bacmap; Genoscope; JGI, KEGG, NCBI; Karyn's Genomes | Database                                  |
| KEGG Orthology                                                                                                                  | Functional inference                      |
| MetaCyc, MicroCyc, FAPROTAX; IJSEM                                                                                              | Functional inference;<br>Trait assignment |
| Ecological traits                                                                                                               | Trait assignment                          |
| Guild type, body type, habitat                                                                                                  | Trait assignment                          |
| Morphology, anatomy, potential for chemical reactions, or even ecology traits                                                   | Database                                  |
| Traits, phenotypic traits, quantitative genomic traits                                                                          | Database                                  |
| Habitats and phenotypes                                                                                                         | Database                                  |
| Microbial interactions                                                                                                          | Machine learning                          |

Table 2

| <b>Methods</b>                                                                                                                                                     |
|--------------------------------------------------------------------------------------------------------------------------------------------------------------------|
| builds a pangenome                                                                                                                                                 |
| phylogenetic placement                                                                                                                                             |
| ASR (Wagner Parsimony, ACE ML, ACE REML, ACE PIC)                                                                                                                  |
| HSP (maximum parcimony, empirical probabilities, subtree averaging, SCP)                                                                                           |
| Nearest-neighbor matching of 16S rRNA gene amplicons with genomes from reference databases                                                                         |
| word counting                                                                                                                                                      |
| nearest-neighbour search based on a minimum 16S rRNA sequence similarity                                                                                           |
| BLAST                                                                                                                                                              |
| microbial co-existence patterns                                                                                                                                    |
| microbial co-inhabitation patterns                                                                                                                                 |
| not applicable                                                                                                                                                     |
| If all type strains of a species at the genus level share the function, FAPROTAX assumes that all uncultured organisms of this genus possess the putative function |

Table 2

|                                                                                                        |
|--------------------------------------------------------------------------------------------------------|
| not applicable                                                                                         |
| PICRUSt; custom trait assignment                                                                       |
| not applicable                                                                                         |
| not applicable                                                                                         |
| PICRUSt                                                                                                |
| custom methods (provides functional information about upper-rank taxa when organism name is not found) |
| not applicable                                                                                         |
| not applicable                                                                                         |
| not applicable                                                                                         |
| not applicable                                                                                         |
| ToMap (Text to ontology mapping)                                                                       |
| Support-vector machine (SVM)-based classifier                                                          |

Table 2

| Inputs used                                    | Strengths and Specificities                                                                                                                                                                                                                                                                                                                                                                                            |
|------------------------------------------------|------------------------------------------------------------------------------------------------------------------------------------------------------------------------------------------------------------------------------------------------------------------------------------------------------------------------------------------------------------------------------------------------------------------------|
| NCBI taxonomy                                  | <ul style="list-style-type: none"> <li>- uses functional profile of the pangenome so could be less sensitive to horizontal gene transfer</li> </ul>                                                                                                                                                                                                                                                                    |
| based on rDNA amplicon sequences               | <ul style="list-style-type: none"> <li>- 18S rRNA amplicons are taken into account</li> <li>- examples on the developer's blog</li> </ul>                                                                                                                                                                                                                                                                              |
| Greengenes taxonomy (18may2012 or v13.5/v13.8) | <ul style="list-style-type: none"> <li>- evolutionary models are taken into account</li> <li>- confidence score generated (NSTI)</li> <li>- correction of OTU copy numbers</li> </ul>                                                                                                                                                                                                                                  |
| based on rDNA amplicon sequences               | <ul style="list-style-type: none"> <li>- evolutionary models are taken into account</li> <li>- confidence score generated (NSTI)</li> <li>- twice as many KO scores</li> <li>- multiple HSP methods can be implemented (takes branch length weighting into account)</li> <li>- 18S rRNA and ITS amplicons are taken into account</li> <li>- extensive documentation and active community</li> </ul>                    |
| based on rDNA amplicon sequences               | <ul style="list-style-type: none"> <li>- regular updates of functional databases</li> <li>- rRNA copy number adjustment</li> </ul>                                                                                                                                                                                                                                                                                     |
| Greengenes; SILVA                              | <ul style="list-style-type: none"> <li>- confidence is estimated by bootstrapping</li> <li>- integrated to USEARCH tool</li> </ul>                                                                                                                                                                                                                                                                                     |
| SILVA taxonomy                                 | <ul style="list-style-type: none"> <li>- uses R (multiplatform) with pre-calculated files</li> <li>- confidence score generated (FTU and FSU)</li> <li>- the algorithm could better predict poorly characterized taxa compared to approaches based on ASR with possible large distances in the tree, thanks to a minimum of similarity between sequences</li> </ul>                                                    |
| based on rDNA amplicon sequences               | <ul style="list-style-type: none"> <li>- algorithm with a minimal sequence similarity</li> <li>- uses R (multiplatform) with pre-calculated, highly memory-efficient platform-independent files</li> <li>- confidence score generated (FTU and FSU)</li> <li>- KO update from 2018</li> <li>- calculates the redundancy of specific functions directly</li> <li>- builds its own habitat-specific reference</li> </ul> |
| RDP, SILVA                                     | <ul style="list-style-type: none"> <li>- pathway exclusion cut-off value is available to provide the minimum percentage of genes/enzymes belonging to a metabolic pathway required to consider the pathway as functional.</li> <li>- compares two datasets</li> </ul>                                                                                                                                                  |
| RDP, Greengenes, SILVA                         | <ul style="list-style-type: none"> <li>- user-friendly for non-expert bioinformaticians</li> <li>- integrated tools for statistical comparisons</li> <li>- graphical visualizations</li> </ul>                                                                                                                                                                                                                         |
| based on UNITE taxonomy (ITS)                  | <ul style="list-style-type: none"> <li>- trait quality for taxon assignment</li> </ul>                                                                                                                                                                                                                                                                                                                                 |
| SILVA (128, 132)                               | <ul style="list-style-type: none"> <li>- based on the literature of cultured taxa</li> <li>- availability of all literature to create the database</li> <li>- functions easily added to the tool</li> </ul>                                                                                                                                                                                                            |

Table 2

|                                          |                                                                                                                                                                                                                                                   |
|------------------------------------------|---------------------------------------------------------------------------------------------------------------------------------------------------------------------------------------------------------------------------------------------------|
| NCBI taxonomy                            | <ul style="list-style-type: none"> <li>- provides links to ENA, GenBank, SILVA, BRENDA, GBIF, ChEBI, Straininfo website data</li> <li>- a match with 16S rRNA sequences is available from SILVA</li> </ul>                                        |
| Greengenes                               | <ul style="list-style-type: none"> <li>- biologically interpretable traits (Gram staining, oxygen tolerance, biofilm formation, pathogenicity, mobile element content and oxidative stress tolerance)</li> </ul>                                  |
| not applicable                           | <ul style="list-style-type: none"> <li>- 16S rRNA accession numbers available</li> </ul>                                                                                                                                                          |
| not applicable                           | <ul style="list-style-type: none"> <li>- phenotypic inference</li> <li>- large resource (~545,000 phenotypes scanning 424 traits across 3,046 species)</li> <li>- NCBI taxonomy available</li> </ul>                                              |
| Greengenes                               | <ul style="list-style-type: none"> <li>- explores simultaneous and integrative studies of taxonomic and functional profiles</li> </ul>                                                                                                            |
| NCBI taxonomy                            | <ul style="list-style-type: none"> <li>- pathway score and pathway frequency score are provided, allowing knowledge of number of enzymes present in the pathway</li> </ul>                                                                        |
| based on UNITE taxonomy (ITS)            | <ul style="list-style-type: none"> <li>- uses R (multiplatform)</li> <li>- complementary to FUNGuild</li> </ul>                                                                                                                                   |
| based on UNITE taxonomy (ITS)            | <ul style="list-style-type: none"> <li>- expert work to propose traits at the genus level</li> <li>- merges the FUNGuild and FunFun tools</li> <li>- an excel file with vlookup function is available to assign guilds or trait data</li> </ul>   |
| not applicable                           | <ul style="list-style-type: none"> <li>- link to tree species associated</li> <li>- includes images</li> </ul>                                                                                                                                    |
| NCBI taxonomy, GTDB taxonomy             | <ul style="list-style-type: none"> <li>- groups the major bacterial and archaeal databases into one database</li> <li>- traits and species data condensed</li> <li>- R workflow available to retrieve condensed trait and species data</li> </ul> |
| NCBI taxonomy                            | <ul style="list-style-type: none"> <li>- term relevance is evaluated by the semantic search engine PubMedBiotope</li> <li>- maintained by around 30 microbiology experts</li> </ul>                                                               |
| No specific taxonomy, just species level | <ul style="list-style-type: none"> <li>- original approach to get information on microbial interactions rapidly</li> </ul>                                                                                                                        |

Table 2

| <b>Limitations</b>                                                                                                                                                                                                     |
|------------------------------------------------------------------------------------------------------------------------------------------------------------------------------------------------------------------------|
| <ul style="list-style-type: none"> <li>- evolutionary models are not taken into account</li> <li>- no confidence score generated</li> <li>- not yet available for microbial eukaryotes</li> </ul>                      |
| <ul style="list-style-type: none"> <li>- errors may occur with sequence placement due to poor resolution of rRNA amplicons in some clades</li> </ul>                                                                   |
| <ul style="list-style-type: none"> <li>- based on specific taxonomy (GreenGenes identifiers)</li> <li>- KEGG database not updated since 2011</li> <li>- no pre-calculated table of fungal genomes available</li> </ul> |

- errors may occur with sequence placement due to poor resolution of rRNA amplicons in some clades

|                                                                                                                                                                                                                                              |
|----------------------------------------------------------------------------------------------------------------------------------------------------------------------------------------------------------------------------------------------|
| <ul style="list-style-type: none"> <li>- available online only</li> <li>- available for 16S rRNA only</li> </ul>                                                                                                                             |
| <ul style="list-style-type: none"> <li>- no peer-reviewed publication (biorxiv preprint)</li> <li>- detailed explanation is missing (e.g., how was protrait input created?)</li> </ul>                                                       |
| <ul style="list-style-type: none"> <li>- based on specific taxonomy (SILVA identifiers)</li> <li>- KEGG database not updated since 2011</li> </ul>                                                                                           |
| <ul style="list-style-type: none"> <li>- not yet available for microbial eukaryotes</li> </ul>                                                                                                                                               |
| <ul style="list-style-type: none"> <li>- not longer available</li> <li>- not yet available for microbial eukaryotes</li> </ul>                                                                                                               |
| <ul style="list-style-type: none"> <li>- available online only</li> <li>- not yet available for microbial eukaryotes</li> </ul>                                                                                                              |
| <ul style="list-style-type: none"> <li>- no regular update</li> <li>- 18S rRNA taxonomy with related database not included. However, the database is open-access, and a homemade wrapper can be used for 18S metabarcoding output</li> </ul> |
| <ul style="list-style-type: none"> <li>- implicit assumption (see algorithm column) could be false with the increase of newly cultured organisms</li> <li>- does not infer upper rank when taxonomic resolution is poor</li> </ul>           |

Table 2

|                                                    |
|----------------------------------------------------|
| - does not provide a tool for metabarcoding output |
| - no peer-reviewed publication (biorxiv preprint)  |
| - does not provide a tool for metabarcoding output |
| - does not provide a tool for metabarcoding output |
| - based on PICRUSt v1                              |
| - not yet available for microbial eukaryotes       |
|                                                    |
| - does not provide a tool for metabarcoding output |
| - specialized in ectomycorrhizas only              |
|                                                    |
| - dedicated to the food domain                     |
| - species name required                            |

## Figures

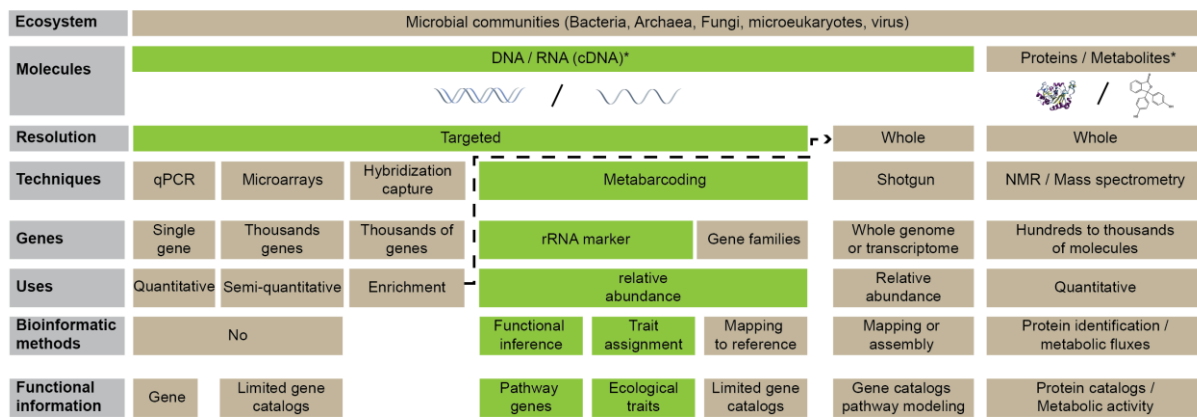

\*DNA: potential functional profiling, RNA/protein: expression functional profiling, Metabolite: activity profiling

Figure 1: **Schematic diagram of the various strategies available for exploring the functional diversity of the microbiota.** Green frames, metabarcoding approaches for retrieving putative functions from taxonomic genes by functional inference and ecological trait assignment.

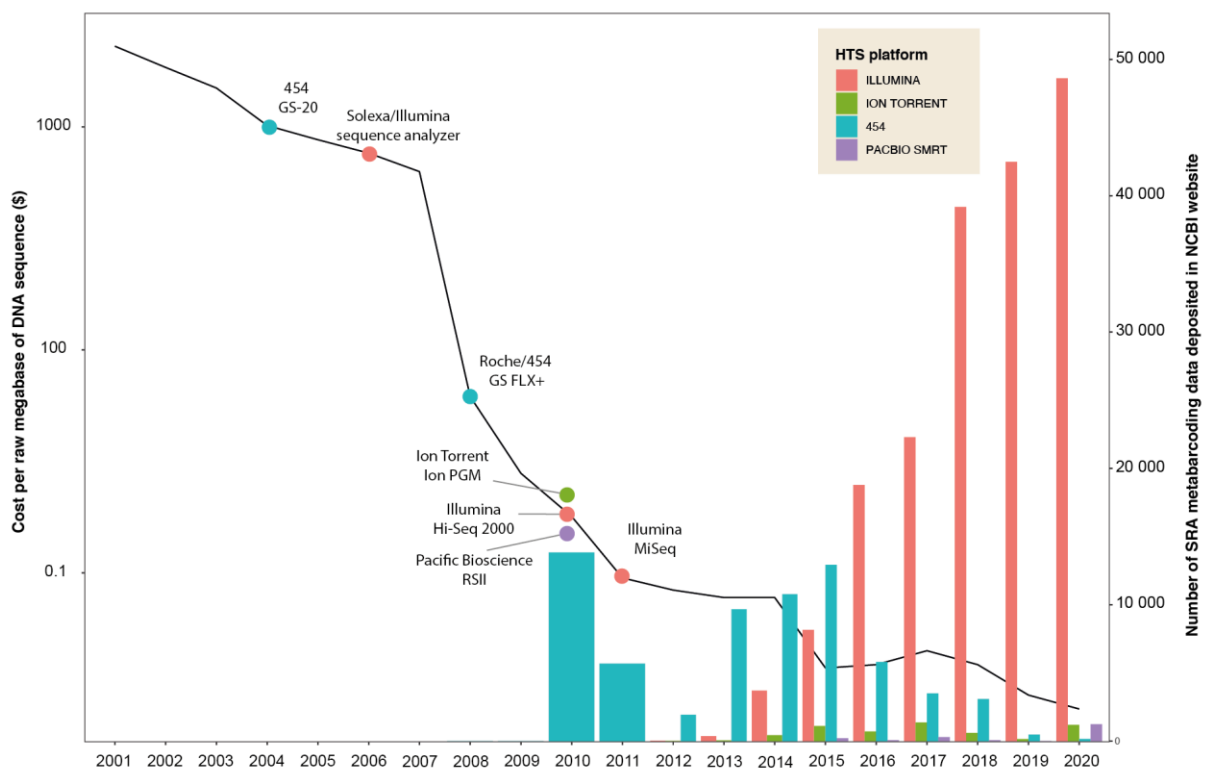

Figure 2: **Evolution of costs (dollars) per raw megabase of DNA sequence (black line with logarithmic scale), and evolution of the number of SRA metabarcoding data deposited in the NCBI website.** The data used to draw this figure is described in Additional file 1.



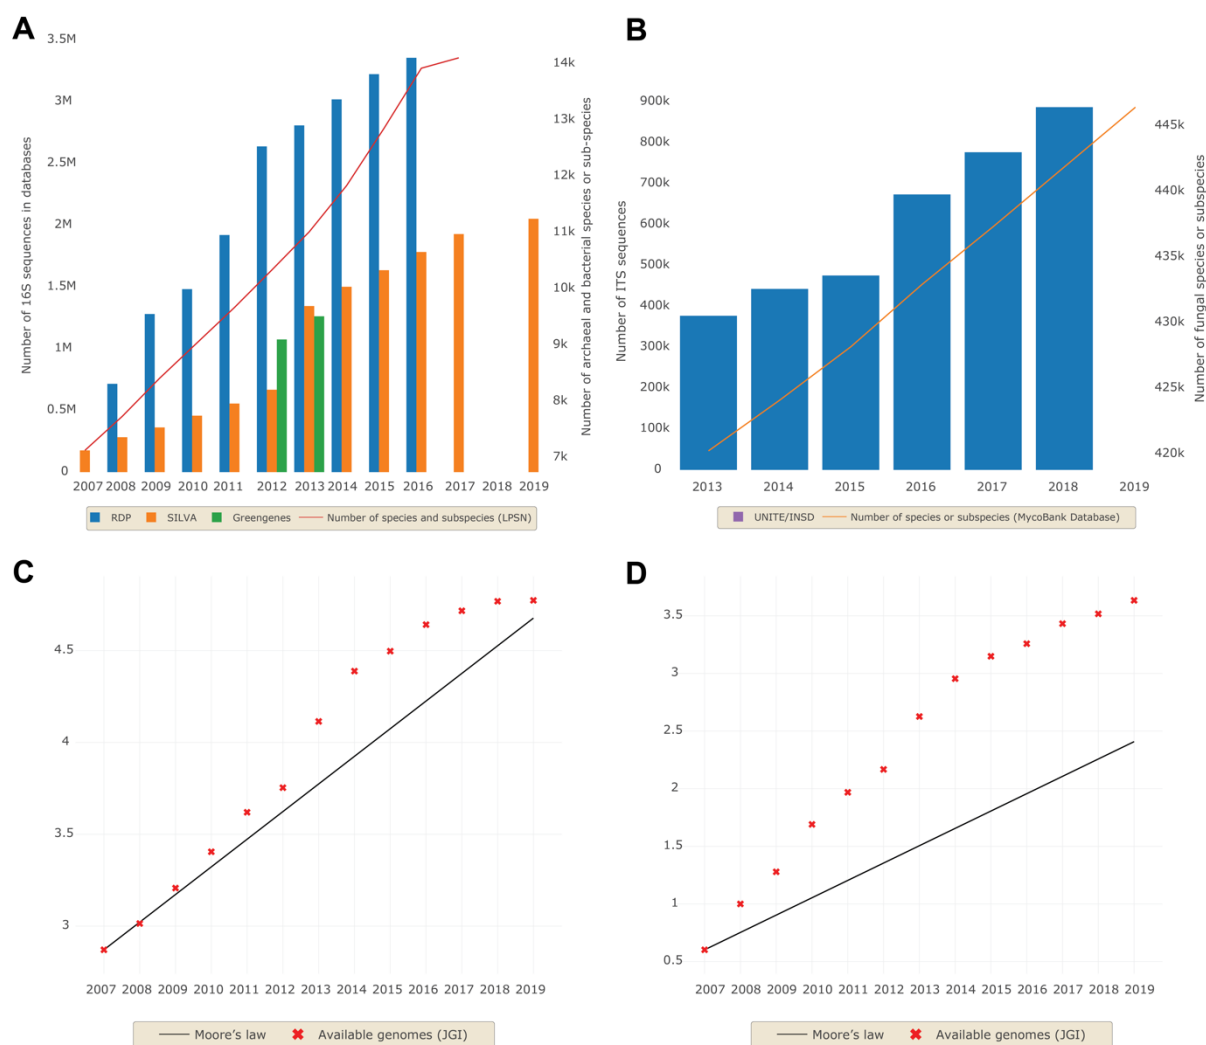

**Figure 3: Annual cumulative growth of databases in terms of bacterial/archaeal (A) and fungal (B) sequences, and species/subspecies deposited *per year*. Comparison of the annual cumulative growth of bacterial/archaeal (C) and fungal (D) genomes compared to simulations of Moore's law. The plot is in logarithmic scale. Three databases were compared for 16S rRNA gene sequences: RDP (blue), SILVA (orange), Greengenes (green). Information is based on the List of Prokaryotic names with Standing in Nomenclature (LPSN [125], <http://www.bacterio.net>) website for bacterial and archaeal species, and on the MycoBank database for fungal species ([126], <http://www.mycobank.org>). Information about the bacterial, archaeal and fungal genomes is based on the Genome OnLine Database (GOLD) [127].**

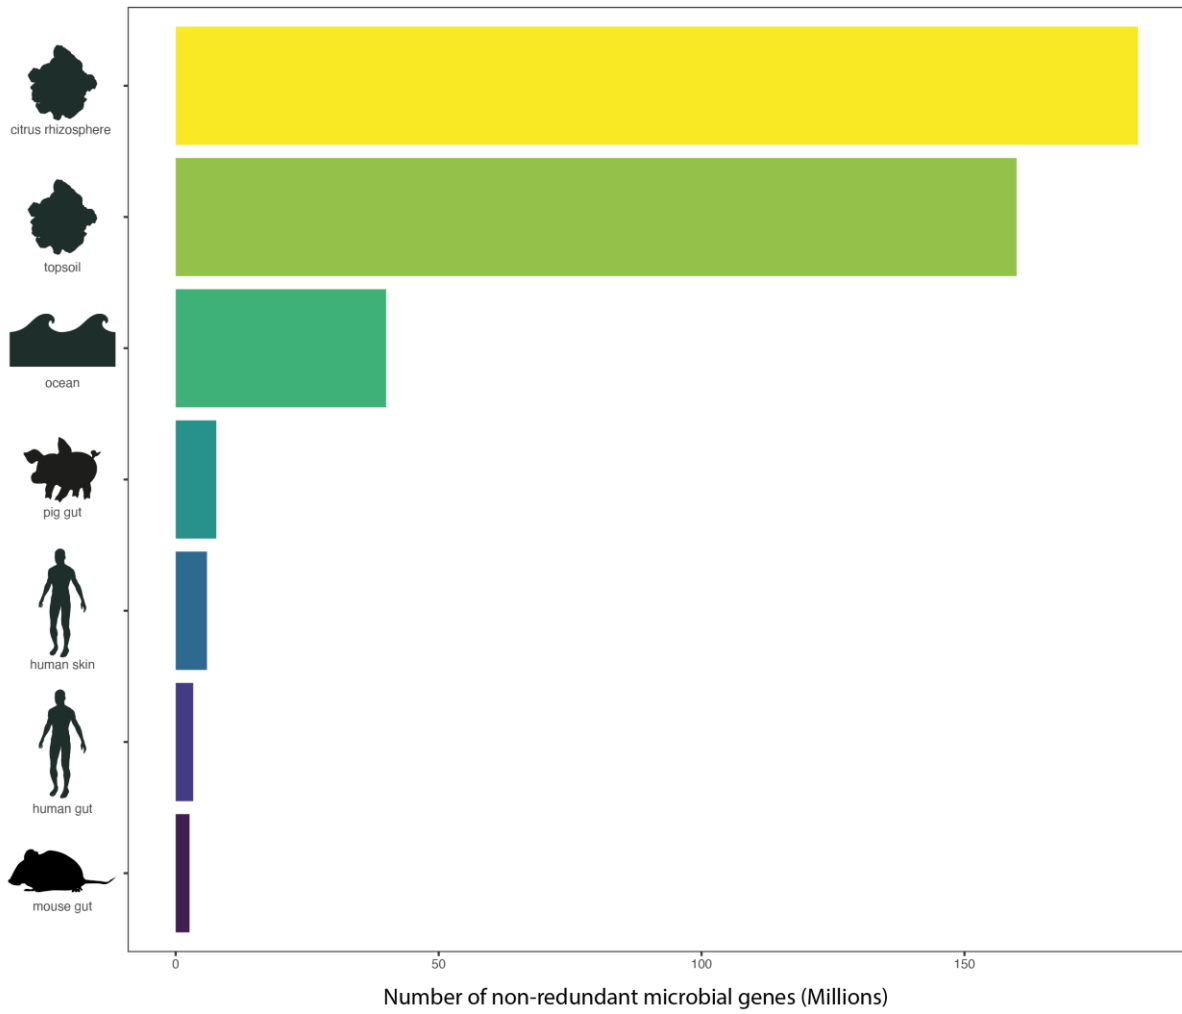

Figure 4: **Global microbial gene catalogs from various ecosystems.** The references are listed in Additional file 1.

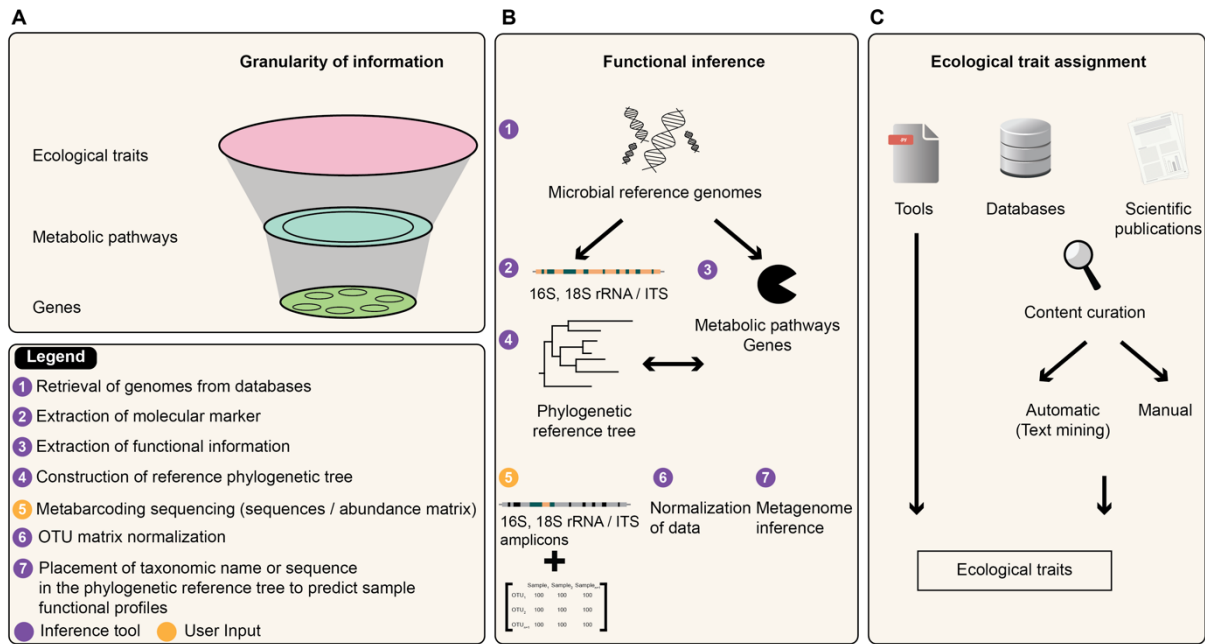

Figure 5: **Diagram of the granularity of the data (A) that can be obtained by functional inference (B) or ecological trait assignment (C).**

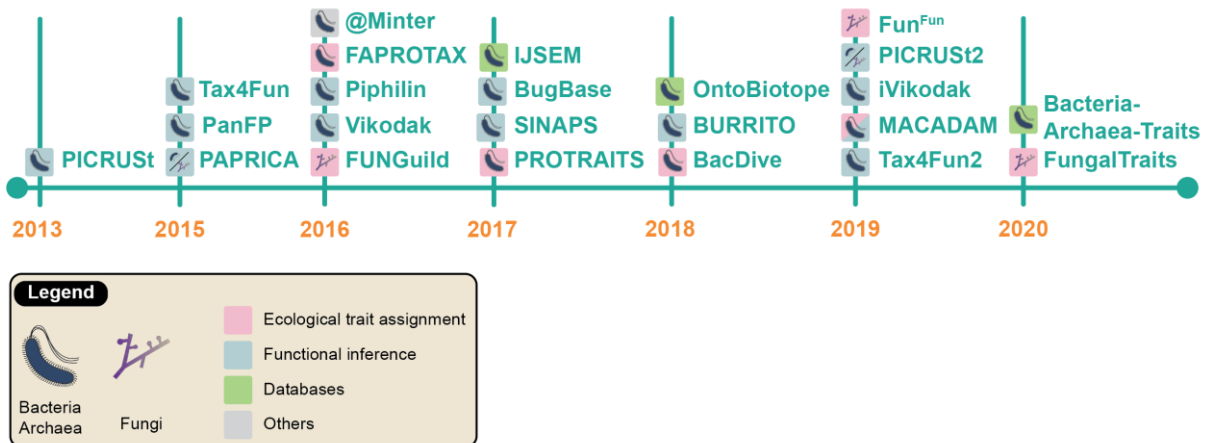

Figure 6: **Timeline depicting the historical record of the major tools developed for functional inference or ecological trait assignment.** The first version of the DEEMY database dates back to 1996; it was not included for aesthetic reasons.

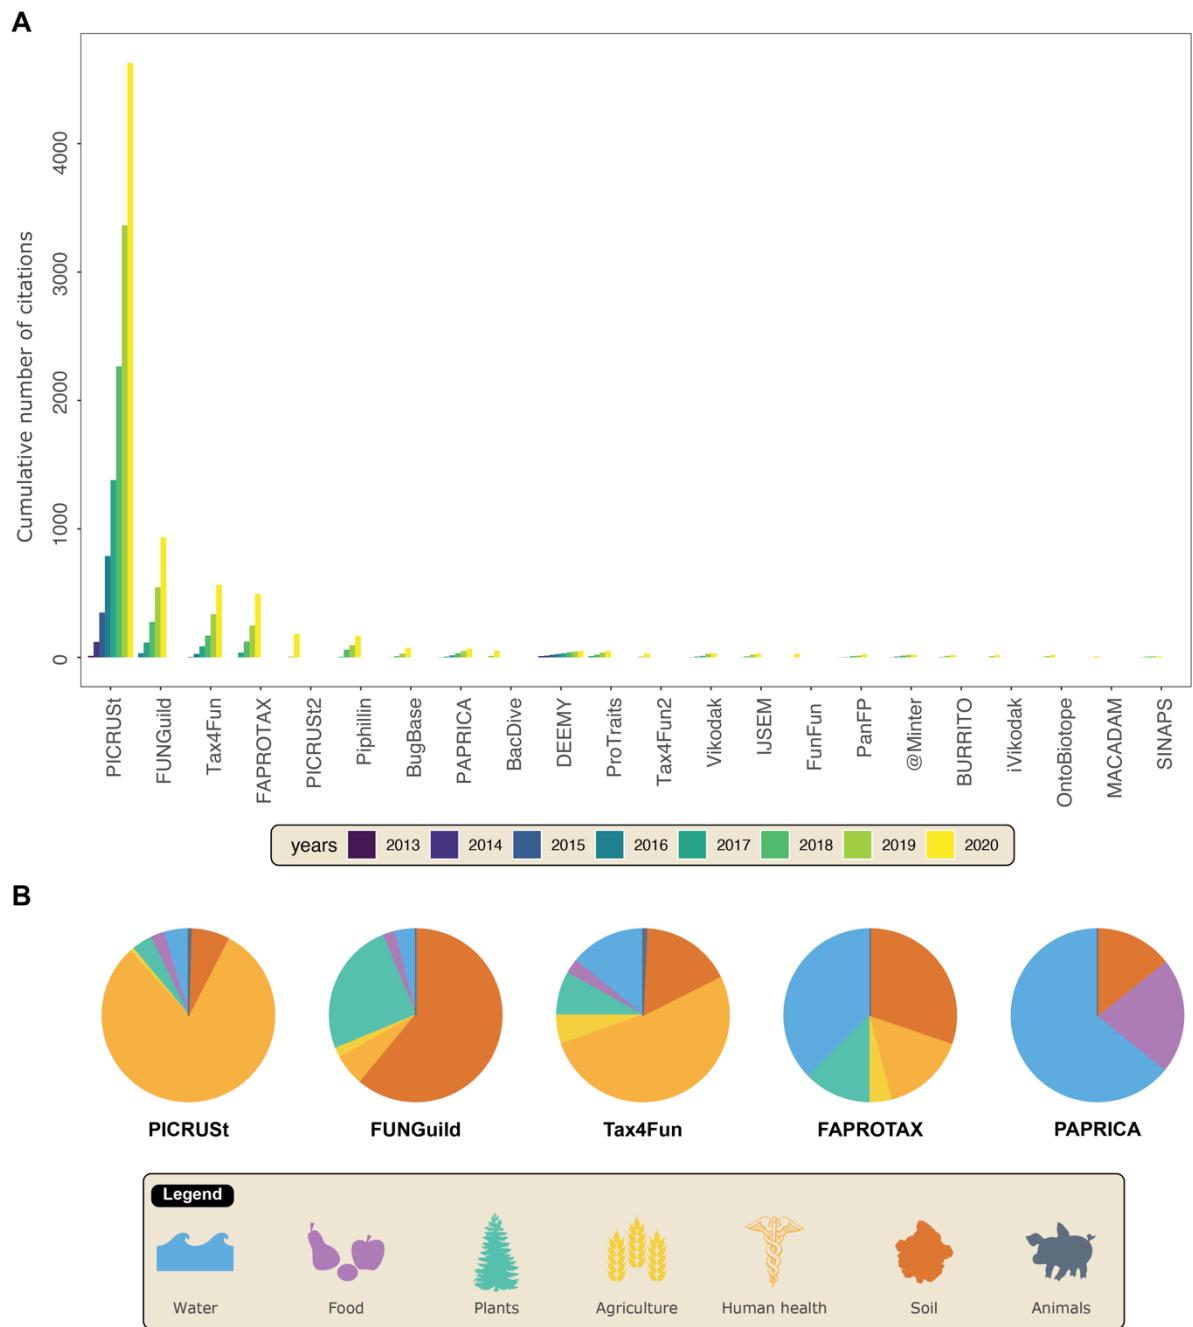

Figure 7: **Annual cumulative number of citations of the major tools (A) and their scope (B).** The keywords used for “scope” were retrieved from the titles and abstracts of the papers listed in Additional file 1.

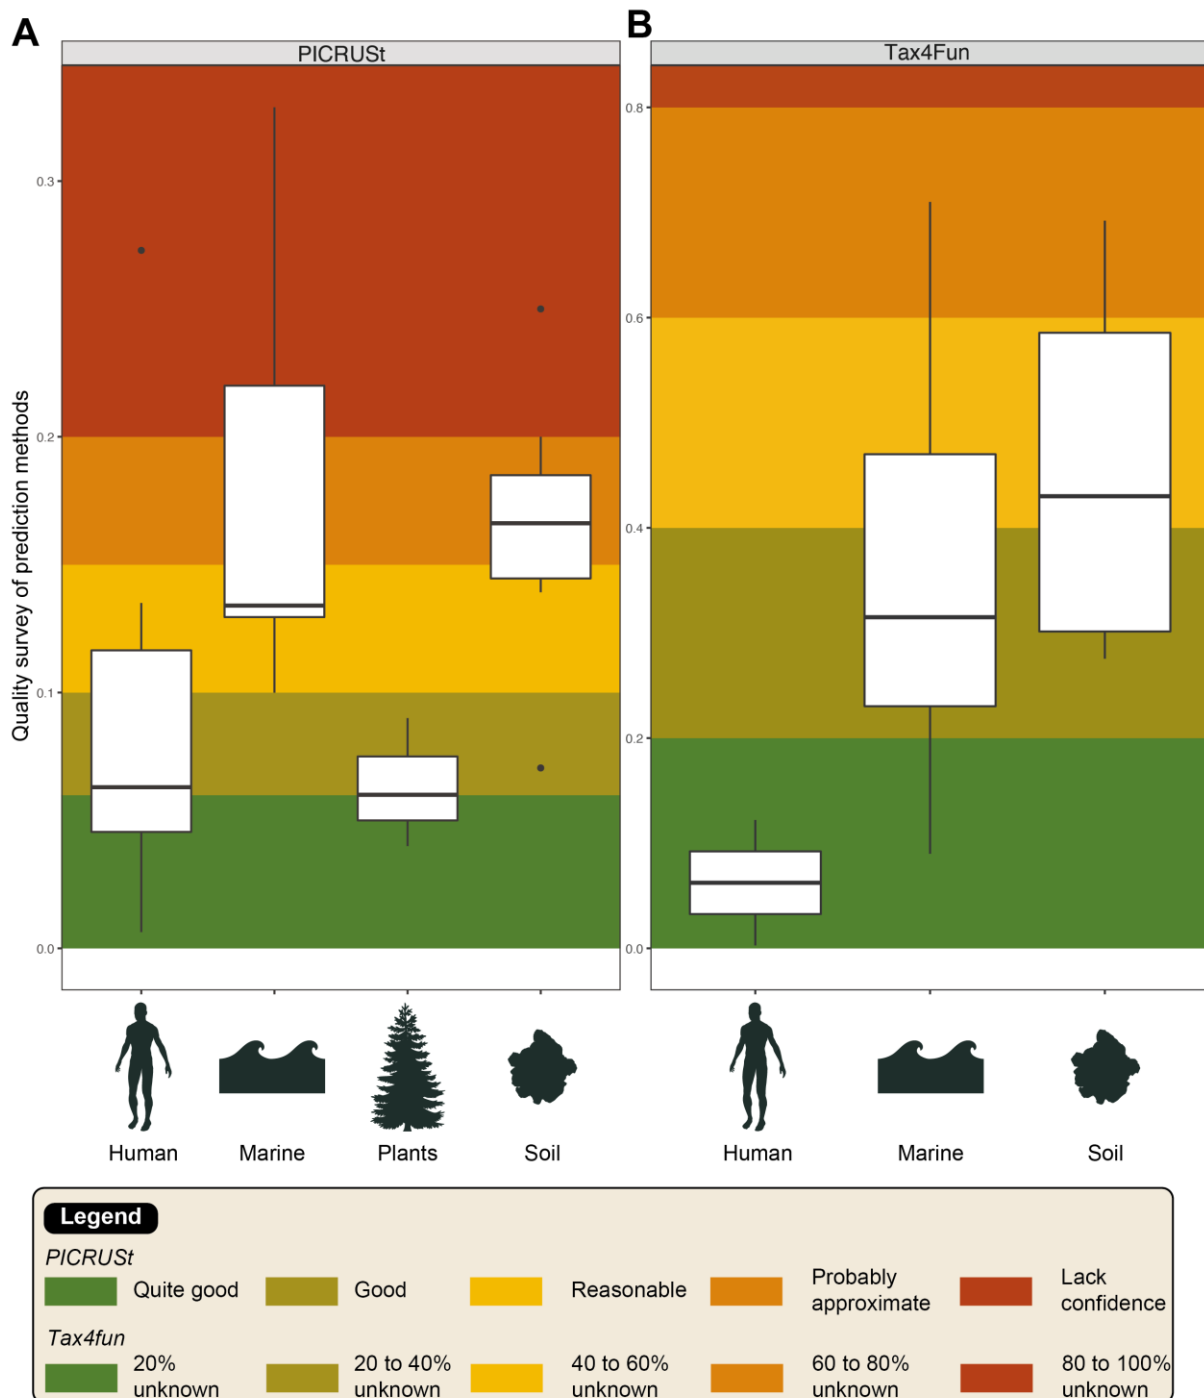

**Figure 8: Overview of the quality of functional prediction based on a subsampling of articles for PICRUSt (A) and Tax4Fun (B) across various ecosystems.** For PICRUSt, colors were assigned according NSTI results: < 0.06, quite good; 0.06 to 0.10, good; 0.10 to 0.15, reasonable but probably approximate; and > 0.20, probably unreliable. For Tax4Fun, we split the fraction of OTUs that could not be mapped to KEGG organisms in 5 harmonious groups. References are listed in Additional file 1.

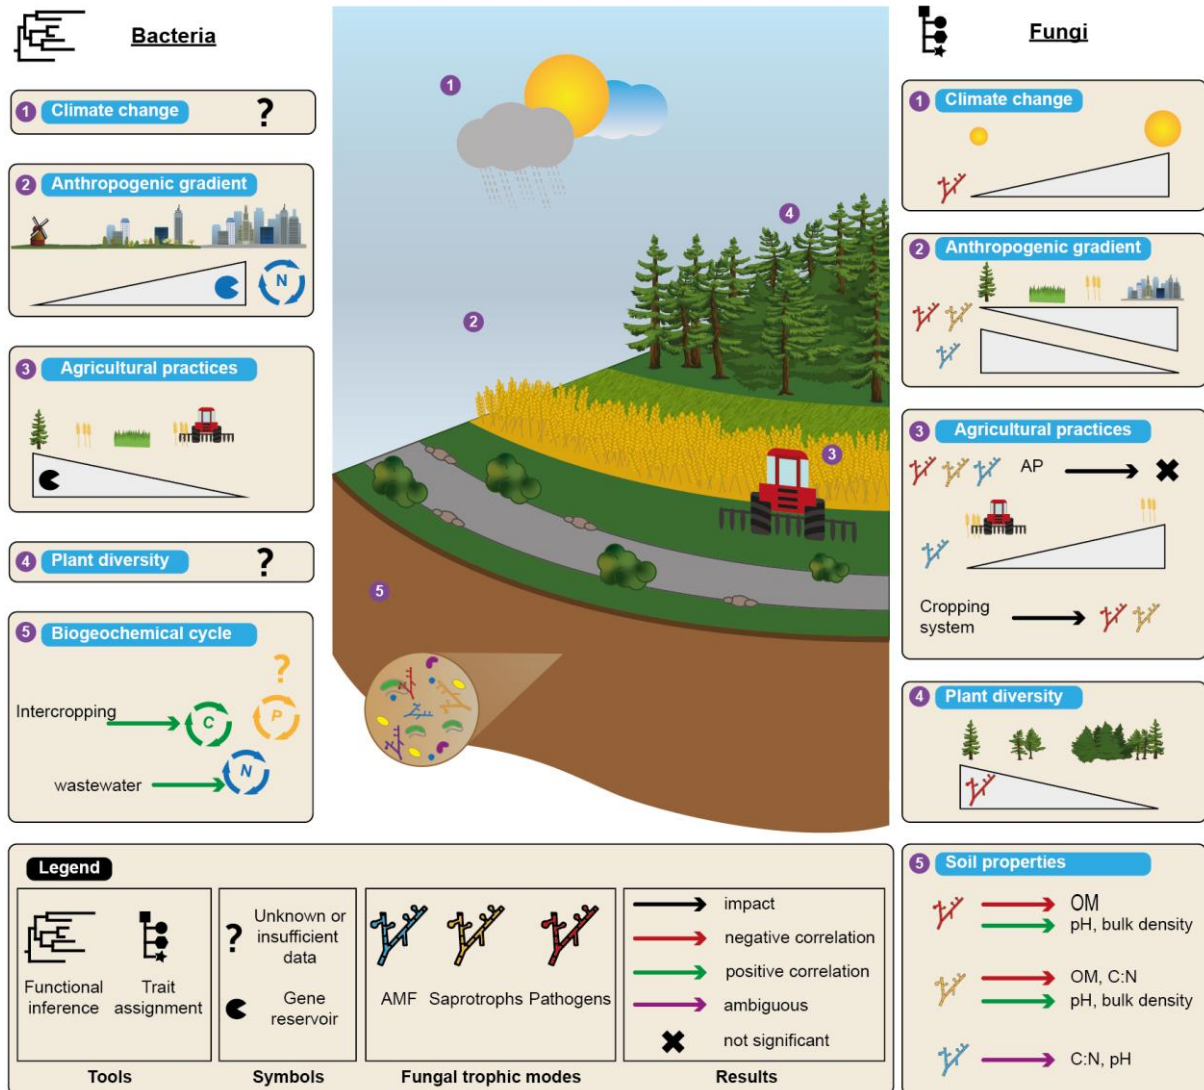

Figure 9: **Summary diagram of the most relevant microbial soil functions results based on functional inference and ecological trait assignment.**

The figure is made up of two parts: studies on bacterial communities based on functional inference on the left, and studies on fungal communities based on ecological trait assignment on the right. For all studies (climate change, anthropogenic gradient, agricultural practices, plant diversity or the biogeochemical cycle), if an impact or a correlation was found on the gene reservoir or on microbial communities with a particular ecological trait, a colored arrow indicates the effect and a cross indicates no significant effect. A triangle indicates either a decrease or an increase of the gene reservoir or microbial communities with a particular trait. References are listed in Additional file 1.

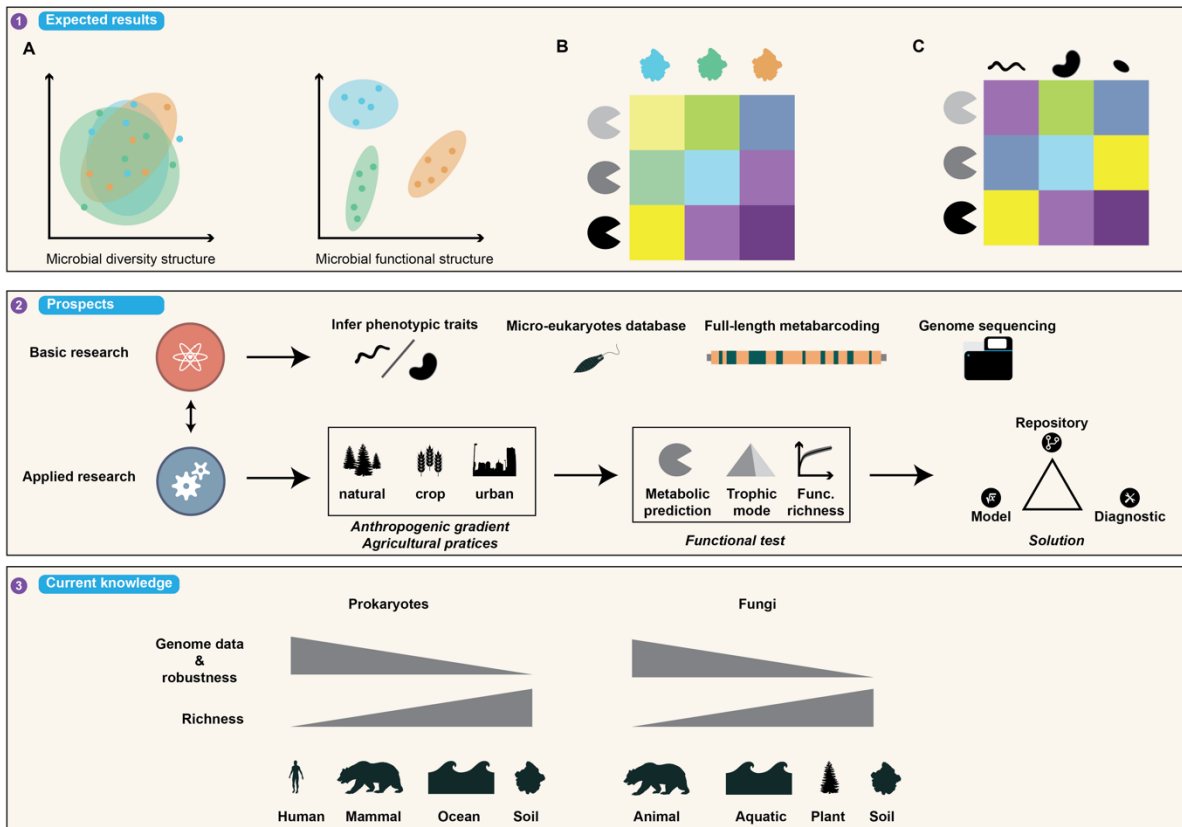

Figure 10: **Summary diagram of the expected results (first box), the functional prediction prospects (second box) and the limits of the microbial genomic data available for different habitats (third box).** The first box illustrates a comparative example of data results of community structures and functional structures through a PCA (A). This example illustrates the case when the functional community structure differentiates experimental conditions better than it differentiates the microbial community structure. Illustrative heat maps showing the relative abundance of genes *per sample* (B) or *per OTU* (C).

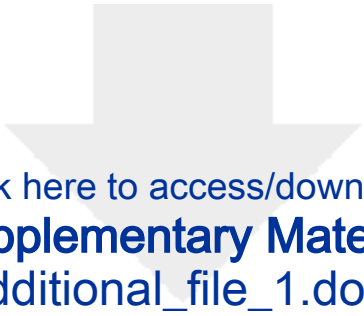

Click here to access/download  
**Supplementary Material**  
Additional\_file\_1.docx





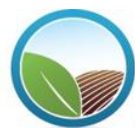

Agroécologie

Dijon  
Unité de Recherche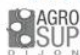

INRAE

UBFC

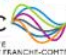UNIVERSITÉ  
BOURGOGNE FRANCHE-COMTÉ

## UMR 1347 - AGROECOLOGIE

RANJARD Lionel (BIOCOM Team)

Phone. : 33 (0) 03 80 69 30 88

Mail : [lionel.ranjard@inrae.fr](mailto:lionel.ranjard@inrae.fr)

Dijon, 04 October 2021

Dear Editor,

We would like to submit the paper entitled “Inferring microbiota functions from taxonomic genes: a review” by Christophe Djemiel, Pierre-Alain Maron, Sébastien Terrat, Samuel Dequiedt, Aurélien Cottin, and Lionel Ranjard for publication in *GigaScience*.

In this paper we review the tools and methods dedicated to functional inference and ecological trait assignment to explore the functional potential of microbial ecosystems. These approaches have been developed after the recent surge of big data in microbial ecology studies thanks to high-throughput sequencing. Some tools have become quite popular thanks to the popularization of metabarcoding, but studies allowing an overview, an evaluation and a ranking of the advantages, specificities and drawbacks of these tools are still blatantly lacking in current literature, both for bacterial and fungal communities.

Overall, our scientific and technical benchmarks show that functional inference and trait assignment are powerful methods for describing changes in the functional potential of complex microbial communities metabarcoding approaches. However, making them a robust diagnostic tool in various fields (e.g. soil studies) still remains a challenge.

We believe that this work will help scientists working on microbial communities make the appropriate choices to best take advantage of the high amounts of microbial data made available.

The work presented in this manuscript is original and has not been published or considered for publication by another journal.

We thank you for considering this manuscript for publication in *GigaScience*.

Yours sincerely,

Lionel RANJARD and Christophe DJEMIEL

10-November-2021

GIGA-D-21-00316 Inferring microbiota functions from taxonomic genes: a review

Dear Dr Ranjard,

Your manuscript "Inferring microbiota functions from taxonomic genes: a review" (GIGA-D-21-00316) has been assessed by our reviewers. Based on these reports, and my own assessment as Editor, I am pleased to inform you that it is potentially acceptable for publication in GigaScience, once you have carried out some essential revisions suggested by our reviewers.

Their reports, together with any other comments, are below. Please also take a moment to check our website at <https://www.editorialmanager.com/giga/> for any additional comments that were saved as attachments.

In addition, please register any new software application in the bio.tools and SciCrunch.org databases to receive RRID (Research Resource Identification Initiative ID) and biotoolsID identifiers, and include these in your manuscript. This will facilitate tracking, reproducibility and re-use of your tool.

Once you have made the necessary corrections, please submit a revised manuscript online at: <https://www.editorialmanager.com/giga/>

If you have forgotten your username or password please use the "Send Login Details" link to get your login information. For security reasons, your password will be reset.

Please include a point-by-point within the 'Response to Reviewers' box in the submission system. Please ensure you describe additional experiments that were carried out and include a detailed rebuttal of any criticisms or requested revisions that you disagreed with. Please also ensure that your revised manuscript conforms to the journal style, which can be found in the Instructions for Authors on the journal homepage. If the data and code has been modified in the revision process please be sure to update the public versions of this too.

The due date for submitting the revised version of your article is 31 Jan 2022. We look forward to receiving your revised manuscript soon.

Best wishes,

Nicole Nogoy, Ph.D

GigaScience

**Reviewer reports:**

**Reviewer #1: This review manuscript provides an overview of the various options that have been developed for inferring function from taxonomic data, for Bacteria, Archaea and Fungi. It should be a good resource and introduction to the topic. One aspect that could be developed a bit more is that of specificity in functional prediction.**

First of all, we want to thank the Reviewer 1 for these commentaries and he pinpoints some drawbacks to help us improving it.

The specific corrections, and modifications advised by the Reviewer 1 will be highlighted in **Green** in the manuscript.

**Throughout, please change "consists in" to "consists of"**

As requested, we did the correction, and checked in the whole manuscript (lines 205, 239, 258, 330).

**Line 113: It is unclear why soil quality is mentioned here**

Indeed, we chose to delete the "soil quality" term to avoid focusing our sentence only just on soil diagnosis, keeping only the global point of view in this background section. We also changed the next sentence in order to ensure consistency ("A repository" to "Repositories").

**Line 145: Change "ocean" to "marine" or "aquatic"?**

As requested, we did the correction in the sentence.

**Line 148: Change "rDNA" to "rRNA gene"**

As requested, we did the correction in the sentence.

**Line 219: The comparison here to shotgun metagenomics should consider the impact of horizontal gene transfer and gene loss.**

As requested, we have added a sentence to indicate that inferred metagenomes do not allow the study of lateral gene transfer and gene loss unlike shotgun metagenomics. In addition, only archaea, bacteria, and fungi can be studied directly by these tools, unlike shotgun metagenomics which provides an overview of all microbial communities.

**Similarly, Line 545 should consider gene deletion in addition to horizontal gene transfer.**

As requested, we have completed our sentence to indicate that gene gain and loss was also due to gene duplication, gene loss, and de novo gene birth in addition to predominant mode HGT. We have also added bibliographic references regarding the identification of HGT from shotgun metagenomic data.

**Line 552: In addition to plasmid transfer, should consider phage / viruses**

As requested, we have added a sentence to complete our paragraph on the transfer of plasmids by phages or viruses.

**Line 665: It could be instructive to provide more examples of practical applications**

Indeed, we were in the same expectation as reviewer 1 but there are very few examples of practical applications. Moreover, this is what we underline throughout our manuscript. However, as requested, we added two examples in the human health on the search for cancer biomarkers and two examples on the biomonitoring of water quality. We have also added bibliographic references regarding these practical applications.

**Line 699: It is not clear why these particular soil measurements are of interest**

Yes, we fully agree with the reviewer 1. As requested, we added a sentence to precise the definition of the volatile organic compound in order clear why it is interesting to use these soil measurements. We also added VOC abbreviation in the section Abbreviations.

**Figure 1: Change "Functional inference" to "Functional inference"**

As requested, we did the correction in the figure 1.

**Figure 2: Add data for most recent years?**

Yes, we fully agree, it is not intended and we added data for 2018, 2019 and 2020 years in the figure 2.

**Figure 9: Change "Unknow or few data" to "Unknown or insufficient data"**

As requested, we did the correction in the figure 9.

**Reviewer: 2**

**Reviewer #2: The authors presented a review about inferring microbiota functions from taxonomic genes. In general, this topic is very important to gain more insights from amplicon based sequencing strategies to decipher the role of the microbiome. The manuscript is clearly written and the authors present nicely the state of current tools.**

**I have just a couple of minor comments that should be addressed.**

First of all, we want to thank the Reviewer 2 for these commentaries and he pinpoints some drawbacks to help us improving it.

The specific corrections, and modifications advised by the Reviewer 2 will be highlighted in **Blue** in the manuscript.

**I wonder whether the author can mention PICRUSt2 earlier in the manuscript as it is a great improvement compared to v1. I would suggest to add one sentence in the section about PICRUSt v1.**

As requested, we have added sentence to describe the main improvements of PICRUSt2 following the paragraph of PICRUSt1 (L271).

**[L176] @MInter should be spelled correctly.**

As requested, we did the correction in the sentence.

**[L224] Picrust should be written PICRUSt**

As requested, we did the correction in the sentence.

**[L421] The author write 'No tool...' but I guess it should be 'The tool...'**

Indeed, it is a clerical error. We did the correction in the sentence.

**[L508] A space is missing ('...fungi - along with...')**

As requested, we added the space.
